1  
2  
3  
4  
5  
6  
7  
8  
9  
10  
11  
12  
13  
14  
15  
16  
17  
18  
19  
20  
21  
22  
23  
24  
25  
26  
27  
28  
29  
30  
31

Human INCL fibroblasts display abnormal mitochondrial and lysosomal networks and  
heightened susceptibility to ROS-induced cell death

Bailey Balouch<sup>1,3</sup>, Halle Nagorsky<sup>1</sup>, Truc Pham<sup>2,4</sup>, Thai LaGraff<sup>2,5</sup>, and Quynh Chu-LaGraff<sup>1,2\*</sup>

<sup>1</sup>. Neuroscience Program, Union College, Schenectady, New York, 12309, USA.

<sup>2</sup>. Department of Biology, Union College, Schenectady, New York, 12309, USA.

<sup>3</sup>. Current address: Drexel University College of Medicine, 2900 W. Queen Lane, Philadelphia, PA 19129, USA.

<sup>4</sup>. Current address: Department of Neurology, Harvard Medical School, Boston Children's Hospital, Boston, MA 02115, USA.

<sup>5</sup>. Current address: Department of Genetics, Harvard Medical School Boston, MA, 02115, USA.

\*Corresponding author

Email: [chulagrq@union.edu](mailto:chulagrq@union.edu)

## 32 **Abstract**

33 Infantile Neuronal Ceroid Lipofuscinosis (INCL) is a pediatric neurodegenerative disorder  
34 characterized by progressive retinal and central nervous system deterioration during infancy.  
35 This lysosomal storage disorder results from a deficiency in the Palmitoyl Protein Thioesterase 1  
36 (PPT1) enzyme - a lysosomal hydrolase which cleaves fatty acid chains such as palmitate from  
37 lipid-modified proteins. In the absence of PPT1 activity, these proteins fail to be degraded,  
38 leading to the accumulation of autofluorescence storage material in the lysosome. The  
39 underlying molecular mechanisms leading to INCL pathology remain poorly understood. A role  
40 for oxidative stress has been postulated, yet little evidence has been reported to support this  
41 possibility. Here we present a comprehensive cellular characterization of human PPT1-deficient  
42 fibroblast cells harboring Met1Ile and Tyr247His compound heterozygous mutations. We  
43 detected autofluorescence storage material and observed distinct organellar abnormalities of the  
44 lysosomal and mitochondrial structures, which supported previous postulations about the role of  
45 ER, mitochondria and oxidative stress in INCL. An increase in the number of lysosomal  
46 structures was found in INCL patient fibroblasts, which suggested an upregulation of lysosomal  
47 biogenesis, and an association with endoplasmic reticulum stress response. The mitochondrial  
48 network also displayed abnormal spherical punctate morphology instead of normal elongated  
49 tubules with extensive branching, supporting the involvement of mitochondrial and oxidative  
50 stress in INCL cell death. Autofluorescence accumulation and lysosomal pathologies can be  
51 mitigated in the presence of conditioned wild type media suggesting that a partial restoration via  
52 passive introduction of the enzyme into the cellular environment may be possible. We also  
53 demonstrated, for the first time, that human INCL fibroblasts have a heightened susceptibility to  
54 exogenous reactive oxygen species (ROS)-induced cell death, which suggested an elevated basal

55 level of endogenous ROS in the mutant cell. Collectively, these findings support the role of  
56 intracellular organellar networks in INCL pathology, possibly due to oxidative stress.

57

## 58 **Introduction**

59           Neuronal Ceroid Lipofuscinoses (NCL), commonly known as Batten Disease, is  
60 presently a group of 14 inherited fatal neurological disorders. Collectively, NCLs affect 1 in  
61 100,000 live-births worldwide, and as many as 1 in 12,500 in countries of Anglo-Saxon descent  
62 [1, 2]. Although NCLs are of varying underlying genetic causes, ages of onset and severity, the  
63 group shares many similar clinical presentations, most notably the progressive deterioration of  
64 the visual and central nervous system, and the accumulation of unwanted autofluorescence  
65 storage materials in the lysosomes. The infantile form, INCL, typically presents during infancy  
66 at 6-12 months of age with widespread progressive retinal and central nervous system (CNS)  
67 degeneration; this leads to the rapid and severe deterioration in cognitive function, vision, motor  
68 coordination, and seizures [2-6]. Lifespan is reduced to 8-11 years [3], or as short as 6 years in  
69 the most severe cases [7]. While the disease is typically managed with medications to diminish  
70 symptom severity, there are currently no curative treatment options or medications that  
71 effectively delay disease progression [6].

72           INCL is an autosomal recessive disease caused by loss of function mutations in the CLN1  
73 gene, residing on chromosome 1p32, which encodes for the lysosomal enzyme Palmitoyl Protein  
74 Thioesterase 1 (PPT1) [8]. PPT1 is a hydrolase enzyme responsible for the cleavage of a  
75 thioester bond linking long-chain fatty acids to modified cysteine residues in palmitoylated  
76 proteins [9-13]. Palmitate and other lipids are covalently coupled to proteins via a thioester  
77 linkage with cysteine residues, both of which are necessary for trafficking and membrane  
78 anchorage. Cleavage of the lipid from the protein is necessary for degradation [14-18]. In the  
79 absence of PPT1 enzyme cleavage activity, degradation of these lipid-modified proteins is  
80 deficient, and fatty acid thioesters accumulate in the lysosomes as autofluorescence ceroid or

81 lipofuscin storage materials [4, 9, 13, 16, 19, 20]. The accumulation of ceroid or lipofuscin in  
82 lysosomes is characteristic of all subtypes of Batten Disease [21] and is heterogeneous in  
83 composition, consisting of proteins, proteolipids and metals [19, 20]. Specifically in INCL  
84 neurons, these lipid-protein aggregates appear in the form of granular osmiophilic deposits  
85 (GRODs) and are curvilinear, fingerprint, or rectilinear shaped [13, 21, 22] as detected by  
86 electron microscopy studies [9, 20, 23]. GRODs have been identified in neurons as well as non-  
87 neuronal cell types including lymphocytes [23, 24], fibroblasts [23, 25, 26], and brown adipose  
88 tissues [12].

89         The underlying pathology of INCL and how PPT1 enzyme deficiency leads to neuronal  
90 cell death remains relatively not well understood [17]. Oxidative stress and related damage is a  
91 common pathological feature of numerous neurodegenerative disorders [27, 28]. Studies using  
92 human INCL brains and PPT1 knock-out mice revealed that the loss of PPT1 leads to caspase  
93 activated pathway of apoptosis in neurons, presumably due to ER-induced stress responses [10,  
94 16]. Excess storage material from the lysosome may be trafficked back to the ER, activating the  
95 unfolded protein response (UPR), causing ER stress [10, 17, 19]. Reactive oxygen species (ROS)  
96 are released from the ER in response to stress, triggering mitochondrial-mediated apoptosis, and  
97 contributing to neurodegeneration [17, 19, 29]. Neurons exhibit elevated energetic needs and  
98 thus depend heavily on oxidative metabolism and produce higher levels of ROS than other cell  
99 types, increasing their susceptibility to oxidative stress [29, 30]. Additionally, while PPT1 is  
100 localized to lysosomes in all cell types; in neurons, it is also present in synaptic vesicles  
101 facilitating the recycling of synaptic vesicles after the release of neurotransmitters. PPT1  
102 deficiency in neurons causes reduced availability of synaptic vesicles at axon terminals, possibly  
103 contributing to the progressive neurodegeneration observed in INCL [4, 19].

104           In this study, using a PPT1-deficient fibroblast cell line derived from a male INCL donor  
105 harboring Met1Ile and Tyr247His compound heterozygous mutations, we investigated the link  
106 between ROS-induced ER and mitochondrial dysfunction with INCL pathogenesis. Our results  
107 indicated that INCL patient fibroblasts exhibited a higher level of autofluorescence storage  
108 materials and increased LAMP1 signal. INCL patient cells display organellar pathology,  
109 specifically disrupted lysosomal and mitochondrial networks, an increase in LAMP1-positive  
110 vacuolation, and a heightened susceptibility to ROS. These results suggested that oxidation  
111 damage due to ER and mitochondrial dysfunction contributes to neuronal cell death in INCL.

112           Using a conditioned media paradigm, we determined whether the presence of normal  
113 PPT1 enzyme in culture media would reduce autofluorescence accumulation and organellar  
114 disruption in INCL patient cells, thus lessening cellular pathologies. Previous research has used  
115 conditioned media to investigate N-acetylgalactosamine-6-sulfatase lysosomal enzyme  
116 deficiency in Mucopolysaccharidosis IVA, a lysosomal storage disorder [31]. Similar to N-  
117 acetylgalactosamine-6-sulfatase, PPT1 is secreted into the extracellular space to be taken up by  
118 neighboring cells, through the mannose 6-phosphate mediated pathway [4]. These properties  
119 allow both enzymes to be strong candidates for *in vitro* enzyme replacement through conditioned  
120 media supplementation. Our hypothesis is that wild-type conditioned media would attenuate  
121 abnormal phenotypes in INCL patient cells due to the presence of soluble functional PPT1  
122 enzyme in the media. Conversely, patient conditioned media (i.e. media obtained from patient  
123 cell line cultures), added to wild-type cultures, may provoke an abnormal phenotype due to the  
124 presence of secreted toxic factors. Our results supported this hypothesis: patient cells exposed to  
125 wild type conditioned media exhibited reduced levels of autofluorescence and LAMP1 signal *in*  
126 *vitro* as compared to comparable patient cells. However, although the disease pathology lessened,

127 patient cells grown in the presence of normal PPT1 enzyme could not be completely restored to  
128 wild type cellular level, most likely due to the loss of continuous endogenous PPT1 function.

129

## 130 **Materials and Methods**

### 131 *Fibroblast Cell Lines and Conditioned Media Protocol*

132 A PPT1-deficient human fibroblast cell line, GM20389, was derived from a nineteen-  
133 year old INCL male harboring Met1Ile and Tyr247His compound heterozygous mutations  
134 (Coriell Institute, NJ, USA). A human dermal fibroblast cell line, GM05659, was obtained from  
135 a healthy donor as a control (Coriell Institute, NJ, USA). Additionally, two established and  
136 transformed cell lines, the human foreskin fibroblasts line HFF and human lung fibroblasts line  
137 MRC-5, were used as additional controls (ATCC, Inc. VA, USA). HFF and MRC-5 cells were  
138 cultured in either DMEM or EMEM supplemented with 4.5 g/L glucose and sodium pyruvate  
139 (Corning, Inc. Virginia, USA), 10% Fetal Bovine Serum (FBS) (Atlanta Biologicals, Georgia,  
140 USA) 1% penicillin-streptomycin (J R Scientific, Inc, California, USA) and 1% of 200mM L-  
141 Glutamine (Life Technologies, California, USA). Cultures were incubated at 37° C and 5% CO<sub>2</sub>.

142 Cultures of two human fibroblast lines, wild type GM05659 (WT) and INCL patient  
143 GM20389 (PT), were used to produce the WT- and PT-conditioned media. Conditioned media  
144 was obtained by saving media from either WT or PT two-three days old cultures. Cells were  
145 maintained at confluency in T25 flasks for six weeks in order to prevent proliferation and allow  
146 for better modeling of the post-mitotic state of neurons. Media was replaced every 2-3 days with  
147 50% fresh media and 50% of either WT- or PT- conditioned media. Four conditioned groups  
148 were created - group 1: WT culture receiving 50% WT conditioned media (WT+WT), group 2:

149 WT culture receiving 50% PT conditioned media (WT+PT), group 3: PT culture receiving 50%  
150 WT media (PT+WT), and group 4: PT culture receiving 50% PT conditioned media (PT+PT).

151

## 152 *Fixation and Antibody Staining*

153 Early passage cells (passage 2 through 5) were counted using the Scepter automated cell  
154 counter (MilliporeSigma, Massachusetts, USA) and cells were plated onto coverslips onto a 12-  
155 well plate, at a density of  $4 \times 10^4$  cells per well, 48 hours prior to fixation for maximum  
156 adherence. Cells were then fixed in 4% formaldehyde in Phosphate Buffered Saline (PBS) for 15  
157 minutes at room temperature, followed by three washes with PBS, followed by permeabilization  
158 with PBT (PBS with 0.1% Tween-20) and three more PBS washes. Cells were stained with  
159 either single or a combination of the following: phalloidin conjugated to Alexa-594 [1:1250]  
160 (Thermo Scientific, Germany), phalloidin conjugated to Alexa-488 [1:1000] (Thermo Scientific,  
161 Germany), MitoTracker [600nM] (Molecular Probes- Invitrogen, Oregon, USA), or DAPI [1  
162  $\mu\text{g}/\text{mL}$ ] (MilliporeSigma, Massachusetts, USA) intracellular markers. The following primary  
163 antibodies were used: Monoclonal anti-LAMP1[1:200] (antibody #H4A3-s Developmental  
164 Studies Hybridoma Bank, Iowa, USA), polyclonal anti-cathepsin D [1:200] (antibody #bs-1615R  
165 Bioss Antibodies, Massachusetts, USA), polyclonal anti-vimentin [1:200] (antibody #bs-0756R  
166 Bioss Antibodies, Massachusetts, USA), and monoclonal anti-beta-tubulin [1:200] (antibody  
167 #86298T Cell Signaling, Massachusetts, USA). Secondary antibodies used were Alexa 488-  
168 conjugated goat anti-mouse, Alexa 594-conjugated rabbit anti-mouse, Alexa 488 or Alexa 594-  
169 conjugated goat anti-rabbit secondary antibody [1:400] (Invitrogen, Inc. Oregon, USA). Cells  
170 were incubated in: Phalloidin for 30 minutes, MitoTracker for 120 minutes, DAPI for 5 minutes,  
171 primary antibodies for 60 minutes, and secondary antibodies for 45 minutes. All incubations took



172 place at 37° C and 5% CO<sub>2</sub>. Staining was followed by three additional PBS washes, and a final  
173 wash in dH<sub>2</sub>O.

#### 174 *Fluorescence Imaging and Analysis*

175 Following fixation and staining with the appropriate antibodies or intracellular markers,  
176 coverslips were mounted onto microscope slides using anti-fade medium (Molecular Probes-  
177 Invitrogen, Oregon, USA), and visualized with a Zeiss AX10 Observer A1 inverted microscope,  
178 equipped with a SPOT imaging camera and software (Diagnostic Instruments Inc, Michigan,  
179 USA). Fluorescence was observed using DAPI (ex 358nm / em 461nm), GFP (ex 488nm / em  
180 530nm), and Texas Red (ex 596nm / em 620nm) filter channels. Cells were viewed with 100X-  
181 oil immersion and 40X objectives.

182 For quantitative fluorescence imaging, all cells were imaged at 100X magnification with  
183 oil immersion objective. The imaging parameters were optimized for every staining. Slides free  
184 of previous fluorescence exposure were imaged using identical parameters. To account for  
185 photobleaching, all slides were imaged sequentially, and fluorescence exposure was timed and  
186 limited to less than 45 minutes per slide. Only non-overlapping cells were imaged for  
187 quantitative fluorescence analysis, in order to not mistake combined signal for increased signal  
188 intensity. Images were analyzed using the freehand selection tool in ImageJ (NIH, Maryland,  
189 USA) to trace the perimeter of cells and obtain measurements of mean and maximum intensity.  
190 A square representative of the background signal was also measured for each image. The  
191 background signal was subtracted from the mean signal intensity of the cell to be used for  
192 analysis.

193 To count vacuolation, the number of vacuoles in HFF and PPT1-deficient cells stained  
194 with LAMP1 were counted using a mechanical hand counter. A minimum of 299 cells were

195 analyzed per conditioned group, across three replicates. Only vacuoles with a defined border  
196 were counted. Images of LAMP1-positive vacuoles reported [32] were used as reference. For  
197 autofluorescence analysis, a minimum of 121 cells were analyzed per conditioned group, across  
198 two replicates, and background intensity was subtracted from the mean signal intensity to correct  
199 for heightened background signal due to prolonged exposure time.

200

#### 201 *MTT Cell Viability and H<sub>2</sub>O<sub>2</sub> Induced Cell Death Assay*

202 Cell viability was determined by MTT (C, N-diphenyl-N'-4,5-dimethyl thiazol-2-yl  
203 tetrazolium bromide) assay (Roche, Switzerland), a standard colorimetric assay which uses the  
204 metabolic reduction of the tetrazolium salt to form the colored formazan product [33]. Here,  
205 MTT assay was used to measure metabolic activity as an indicator for cell viability [34]. Cells  
206 were counted using a hemocytometer and adjusted to a concentration of  $1 \times 10^5$  cells/ml.  $1 \times 10^4$   
207 cells (100 $\mu$ l) were plated per well of a 96-well plate. The number of cells plated was determined  
208 based on the finding that  $1 \times 10^4$  cells were confluent in a 96-well plate upon adherence. Because  
209 the assay was used as a viability assay rather than a proliferation assay, cells were plated in 1%  
210 serum containing DMEM, in order to measure the reduction in cell viability with 10,000  
211 confluent cells as the baseline. To measure cell viability, cells were given a 48-hour incubation  
212 period. After the incubation period, 0.5mg/ml of MTT reagent (10  $\mu$ l) was added to each well,  
213 and the plate was incubated for 4 hours to allow the reagent to be reduced. 100  $\mu$ l of  
214 solubilization solution was added to each well, and incubated overnight. Viability was  
215 determined by the absorbance at 550nm minus the reference wavelength 690nm minus a plate  
216 blank (as per manufacturer's protocol). Absorbance was measured using a Spectramax M5 plate  
217 reader (Molecular Devices, California, USA). The experiment was repeated with a viability

218 measurement at 120 hours post-plating. To determine cell viability after hydrogen peroxide  
219 ( $H_2O_2$ ) exposure,  $1 \times 10^4$  cells were plated per well of 96-well plate, and given 24 hours to  
220 adhere. Cells were then treated for 24 hours with 0, 25, 50, or 100  $\mu M$   $H_2O_2$  in DMEM  
221 supplemented with 10% FBS, 1% Glutamine, and 1% penicillin-streptomycin. The MTT  
222 procedure was carried out as described to determine cell viability after 24 hours  $H_2O_2$  exposure.

223

#### 224 *Detection of ROS*

225 Endogenous ROS levels were measured using a ROS-GLO kit (Promega, Wisconsin,  
226 USA) according to manufacturer's protocol. All four conditioned groups were plated at  $2 \times 10^4$   
227 cells per well in a 96 well plate and left in the incubator for 24 hours to adhere, prior to ROS  
228 detection. Luminescence was measured using a Spectramax M5 plate reader (Molecular Devices,  
229 California, USA).

230

#### 231 *Statistics*

232 All statistical calculations were performed using Excel (Microsoft, Washington, USA)  
233 and SPSS Statistics (IBM, New York, USA). Quantitative fluorescent means were normalized to  
234 the WT control of each replicate for both autofluorescence and LAMP1. A one-way ANOVA  
235 was used to compare relative fluorescence intensity (RFI) of LAMP1 in PT and WT cells prior to  
236 the creation of conditioned groups, with a confidence interval of 99%. A one-way ANOVA with  
237 *post-hoc* Tukey HSD test was used to compare RFI of LAMP1 and autofluorescence in  
238 conditioned groups; differences were considered significant at a 99.9% confidence interval. A  
239 two-sample t-test was performed in ROS detection to compare relative luminescence units, and

240 in LAMP1 signal intensity in early passage PT and WT cell lines. H<sub>2</sub>O<sub>2</sub> induced cell death was  
241 analyzed using a univariate ANOVA.

242

## 243 **Results**

### 244 **PPT1-deficient fibroblasts displayed higher autofluorescence and decreased cell viability**

245 The hallmark of INCL is the presence of autofluorescence storage materials in the  
246 lysosomes [13, 21]. We first determined whether autofluorescence signal could be detected in  
247 PPT1-deficient human fibroblasts. Autofluorescence signal can be detected in both wild type  
248 primary human and INCL patient fibroblasts, and in established human fibroblast controls HFF  
249 and MRC using the GFP filter. Autofluorescence was very low, barely detectable in wild type  
250 primary fibroblast (n= 50), HFF (n = 56) and MRC-5 (n = 57) controls, but was marginally  
251 visible in PPT1- deficient fibroblasts (n = 52) (data not shown). We quantify the fluorescence  
252 levels in wild type HFF and MRC fibroblasts and PPT1-deficient fibroblasts to assess whether  
253 the difference between normal and patient cells were statistically significant. Upon relative  
254 fluorescence intensity (RFI) analysis, PPT1-deficient fibroblasts exhibited a 4.5-fold increase in  
255 autofluorescence signal compared to controls. The One-Way ANOVA and *post hoc* Tukey HSD  
256 analysis indicated that this RFI increase was statistically significant ( $p < 0.001$ ). In contrast, RFI  
257 between wild type control cell lines did not differ significantly ( $p = 0.996$ ) (Fig 1).

258

### 259 **Fig 1. Analysis of autofluorescence in normal and PPT1-deficient fibroblasts.**

260 There was a detectable increase in autofluorescence signal in PPT1-deficient fibroblasts  
261 compared to HFF and MRC-5 controls. Autofluorescence was increased >4.5-fold in PPT1-  
262 deficient fibroblasts compared to controls. Cells were stained with phalloidin-594 at 1:1250 to

263 use as a reference for focusing, and imaged using DAPI (ex 358nm / em 461nm) and GFP (ex  
264 488nm / em 530nm) filters. HFF (n = 56), MRC-5 (n = 57), and PPT1 deficient (n = 52)  
265 fibroblasts were analyzed by measuring the relative fluorescent intensity using ImageJ. Error  
266 bars display +SD. There were no significant differences in relative fluorescence intensity  
267 (indicated by “n.s.”) between the HFF and MRC-5 controls (p = 0.885). Fluorescent signal was  
268 significantly higher in PPT1 deficient cells as compared to HFF (\*, p < 0.001) and MRC-5 (\*, p <  
269 0.001) controls.

270

271

272 To investigate the possibility that increased autofluorescence observed in INCL  
273 fibroblasts would lead to impaired cell viability, the MTT (C, N-diphenyl-N'-4,5-dimethyl  
274 thiazol-2-yl tetrazolium bromide) proliferative assay was used to measure metabolic activity as  
275 an indicator for cell viability [34]. PPT1-deficient fibroblast viability was reduced compared to  
276 HFF and MRC-5 controls (Fig 2). Specifically, after 48 hours, PPT1-deficient fibroblast viability  
277 (n = 7) was reduced significantly compared to that of HFF (n = 8) and MRC-5 (n = 8) controls (p  
278 < 0.001). Significant differences were also observed between HFF and MRC-5 controls (p  
279 < 0.001). This experiment was repeated with an incubation time of 120 hours; the same relative  
280 cell viability distribution was observed. PPT1-deficient cell viability (n = 5) was significantly  
281 reduced compared to HFF (n = 7) and MRC-5 (n = 7) controls (p < 0.001). Significant  
282 differences were also observed between control cell lines (p < 0.001).

283

284 **Fig 2. PPT1-deficient fibroblasts display reduced cell viability compared to controls.**

285  $1 \times 10^4$  cells from each group were plated in 5 - 8 wells of a 96-well plate in 1% serum DMEM,  
286 and viability was determined by MTT assay. (A) Viability was determined 48 hours post-plating.  
287 (B) The experiment was repeated with a viability measure at 120 hours post-plating. PPT-  
288 deficient cells displayed a similar reduction in relative cell viability regardless of either time  
289 points. Significant differences were found between all groups (\*,  $p < 0.001$ ).

290

291 **Autofluorescence intensity levels differed significantly between wild type and INCL**  
292 **conditioned groups**

293 Since PPT1-deficient patient fibroblasts exhibit higher autofluorescence and decreased  
294 cell viability, we explored the question of whether exposure to functional PPT1 enzyme would  
295 have an observable effect on autofluorescence accumulation.

296 We examined autofluorescence deposit levels in wild type (WT) and INCL patient (PT)  
297 fibroblasts exposed to either WT and PT conditioned media (grouped as WT+WT, WT+PT,  
298 PT+WT, and PT+PT; see Methods for details). We posited that the autofluorescence pathology  
299 may be attenuated in the presence of functional PPT1 enzymes secreted in the media. Imaging  
300 and quantitation of autofluorescence deposits was conducted using fluorescence microscopy at  
301 excitation 488nm / emission 530nm (GFP) wavelengths (Fig 3).

302 As expected, we observed a three-fold increase in autofluorescence signal intensity ( $p <$   
303  $0.001$ ) between the levels of autofluorescence in the WT+WT (group 1) and PT+PT (group 4)  
304 treatment groups (Fig 3B). Interestingly, PPT1-deficient fibroblasts exposed to wild type  
305 conditioned media displayed significant reduction in autofluorescence as compared to PPT1-  
306 deficient fibroblasts incubated in PT-conditioned media (group 3 vs. 4). Signal intensity was  
307 decreased to nearly half that of PT+PT cells. Nevertheless, PT+WT cells (group 3) still

308 exhibited 1.63 times greater autofluorescence level than the WT+WT (group 1) indicating that  
309 secreted functional enzyme in the media is insufficient to completely restore autofluorescence  
310 pathology to normal levels. Additionally, no statistically difference in intensity was observed in  
311 WT cells grown in either WT- or PT-conditioned media indicating that endogenous functional  
312 PPT1 enzyme were sufficient to overcome potential toxic effects secreted in PT-conditioned  
313 media.

314

315 **Figure 3A. Fluorescence analysis of autofluorescence storage material in four conditioned**  
316 **media groups.**

317 Autofluorescence is higher in PPT1-deficient cells grown in either condition 3 or 4 as compared  
318 to WT cells grown in either WT or PT-conditioned media (condition 1 or 2). Cells were stained  
319 with DAPI at 1:1000 to use as a reference for locating and focusing on cells. Cells were then  
320 imaged using the GFP (ex 488nm / em 530nm) filter.

321 **Figure 3B. Quantitative analysis of autofluorescence storage material in four conditioned**  
322 **media groups.**

323 RFI was measured using ImageJ (n = 2 replicates per group). Significant differences (\*, p <  
324 0.001) were found between all conditioned groups, with the exception of group 1 vs 2, and group  
325 2 vs 3, which are labeled n.s (not significant). Error bars indicate +/- SD.

326

327 **PPT1-deficient fibroblasts displayed abnormal lysosomal distribution and elevated**  
328 **numbers of lysosomal structures**

329 We next investigated whether autofluorescence storage material was spatially consistent with  
330 LAMP1-positive lysosomal structure; and whether increase autofluorescence correlated with  
331 abnormal distribution of the lysosomes in PPT1-deficient fibroblasts.

332 Fluorescence microscopy was performed on primary wild type and PPT1-deficient  
333 fibroblasts, and established HFF and MRC-5 fibroblasts revealed that patient fibroblasts  
334 exhibited a higher level of lysosomal network as demonstrated by increased LAMP1 staining  
335 intensity (Fig 4A). Normal fibroblasts displayed relatively sparse distribution of lysosomes  
336 throughout the cell, with a slightly higher concentration of LAMP1-positive lysosomes in the  
337 perinuclear region. In contrast, PPT1-deficient fibroblasts exhibited LAMP1-positive lysosomes  
338 densely packed throughout the cell body (Fig 4). MFI was compared by one-way ANOVA ( $p <$   
339  $0.001$ ) and *post-hoc* Tukey HSD analysis, which showed that LAMP1-positive signal was  
340 significantly greater in PPT1-deficient fibroblasts ( $n = 118$ ) as compared to HFF ( $n = 114$ ) and  
341 MRC-5 ( $n = 94$ ) controls ( $p < 0.001$ ) (Fig 4B). Furthermore, a direct examination of LAMP1-  
342 positive lysosomal distribution in wild type and PPT1-deficient fibroblasts revealed a detectable  
343 difference in fluorescent signal intensity between early passage (P3) PPT1-deficient fibroblasts  
344 and wild type fibroblasts (Fig 5A). Analysis showed a statistically significant 1.3-fold increase  
345 in LAMP1 signal intensity in PT cells ( $p < 0.01$ ) (Fig 5B).

346

347 **Fig 4. The cytosol of PPT1-deficient fibroblasts is densely packed with lysosomes.**

348 (A) HFF, MRC-5 and PPT1 patient cells stained with LAMP1 antibody show the distribution of  
349 lysosomes. The density of LAMP1 signal increased in INCL cells as compared to controls. (B)  
350 The average LAMP1 signal intensity for the total area occupied by lysosomes was measured  
351 using ImageJ ( $n = 94 - 118$  cells per group). Significant differences were found between controls



352 (\*,  $p < 0.001$ ). PPT1 patient cells had significantly higher signal compared to both controls (\*,  $p$   
353  $< 0.001$ ). Error bars display +SD.

354

355 **Fig 5A. LAMP1 signal in early passage (P3) WT and PPT patient fibroblasts.**

356 Cells were stained with LAMP1 antibody, and imaged using a Texas Red (ex 596nm / em  
357 620nm) filter for fluorescence microscopy. LAMP1 signal was greater in PPT patient cells  
358 compared to WT ( $p < 0.01$ ).

359

360 **Fig 5B. Quantitative analysis of LAMP1 signal in early passage PPT patient and WT**  
361 **fibroblasts.**

362 Average LAMP1 signal intensity was measured using ImageJ ( $n = 40 - 60$  cells for both groups).  
363 A significant 1.3-fold increase (\*,  $p < 0.01$ ) in mean fluorescence intensity (MFI) was found in  
364 PT cells compared to WT. Error bars represent +/- SD.

365

366 **Wild type and PPT patient fibroblasts grown in conditioned media exhibited significant**  
367 **differences in the lysosomal distribution**

368 We next assess whether the observed abnormal lysosomal pathology in PPT1-deficient  
369 fibroblasts can be lessened in the presence of wild type PPT1 enzyme in conditioned media using  
370 LAMP1 antibody staining on all four conditioned groups 1-4 (Fig 6A). LAMP1 fluorescence  
371 intensity was statistically significant ( $p < 0.001$ ) between all conditioned groups (Fig 6B).  
372 PT+PT cells (group 4) exhibited a two-fold increase in LAMP1 signal when compared to the  
373 WT+WT control (group 1). In contrast, a significant reduction in LAMP1 signal was observed in  
374 PT cells grown in WT-conditioned media (group 3) compared to PT+PT cells (group 4), but had

375 a 1.4-fold increase in intensity compared to WT+WT control (group 1). Relative to WT+WT  
376 cells, WT cells conditioned with PT media (group 2) were found to have a 1.2-fold increase in  
377 LAMP1 signal (Fig 6B).

378

379 **Fig 6A. LAMP1 fluorescence signal in four conditioned media groups.**

380 Cells probed for LAMP1 were imaged using the Texas Red (ex 596nm / em 620nm) filter for  
381 fluorescence microscopy.

382

383 **Figure 6B. Quantitative analysis of LAMP1 signal intensity in conditioned media groups.**

384 Relative fluorescence intensity (RFI) was measured using ImageJ (n = 3 replicates per group).

385 Significant differences (\*,  $p < 0.001$ ) were found between all conditioned groups. Error bars

386 indicate +/- SD.

387

388 **PPT1-deficient fibroblasts displayed abnormal mitochondrial network**

389 Lysosomal and mitochondrial dysfunction have previously been associated and  
390 implicated in neurodegeneration [27]. Morphological differences have been identified in PPT1-  
391 deficient fibroblasts using MitoTracker [26], and evidence of mitochondria-mediated apoptosis  
392 has been identified in PPT1 knock-out cells [10]. To follow up on this work, we performed  
393 MitoTracker staining to visualize the mitochondrial network in PPT1-deficient fibroblasts and in  
394 HFF and MRC-5 controls. Morphologically, mitochondrial tubules could be identified in all  
395 control cells observed (Fig 7). MRC-5 cells displayed normal highly branched interconnected  
396 tubules. HFF cells had elongated tubules, but also exhibited normal branching (Fig 7 A&B). In  
397 contrast, PPT1-deficient cells displayed a substantial decrease in mitochondrial tubule branching,

398 and the mitochondrial network instead consisted predominantly of non-tubular spherical punctate  
399 structures (Fig 7C).

400

401 **Fig 7. MitoTracker staining shows disruption of the mitochondrial network in PPT1-**  
402 **deficient fibroblasts.**

403 Mitochondria staining is observed most heavily in the perinuclear region in all cells. Typical  
404 mitochondrial patterning can be seen in controls, where the mitochondria fuse into elongated  
405 tubules with extensive branching (arrowhead in A & B). Branching is partially lost in PPT1-  
406 deficient cells, and the cytosol is overwhelmed with spherical, punctate structures (arrowhead in  
407 C).

408

409 **Analysis of lysosomal dysfunction in PPT1-deficient fibroblasts**

410 Because mitochondrial dysfunction leads to impairment of lysosomal activity [27], we  
411 sought to determine whether indicators for lysosomal dysfunction could be observed in PPT1-  
412 deficient fibroblasts. The enzymatic activity of a lysosomal protease, cathepsin B, has been  
413 shown to be decreased due to pharmacologically-induced mitochondrial dysfunction [27]. We  
414 analyzed the expression pattern of a closely related lysosomal protease, cathepsin D, in PPT1-  
415 deficient fibroblasts because it has been implicated in the initiation of mitochondrial apoptosis  
416 [35]. No differences were observed in the relative cathepsin D-positive signal density between  
417 PPT1-deficient and HFF control fibroblasts (Fig 8). In both cell lines, cathepsin D-positive signal  
418 was observed throughout the body of the cell, and partially within the extending membrane  
419 processes. Although overlap between cathepsin D and LAMP1 signal was observed, cathepsin D  
420 was not exclusively colocalized to LAMP1. As observed previously, PPT1-deficient fibroblasts

421 displayed a substantial increase in LAMP1 signal as compared to wild type HFF cells (Fig 8).  
422 Large LAMP1-positive vacuoles have been shown to form due to ROS produced following  
423 mitochondrial damage [27]. We used vacuole formation as an indicator for lysosomal  
424 impairment, possibly brought on by mitochondrial dysfunction. The occurrence of large vacuoles  
425 formed within LAMP1 stained cells was also increased in PPT1-deficient cells (Fig 8- arrows in  
426 bottom right panel). Vacuoles were identified in 43.6% of PPT1-deficient fibroblasts (n = 78),  
427 but only 14.1% of HFF (n = 78) controls. Of the cells which had visible vacuoles, the number of  
428 vacuoles was also increased to an average of 5 per cell in PPT1-deficient cells versus 2 per cell  
429 in the HFF control.

430

431 **Fig 8. Cathepsin D expression is normal in PPT1-deficient cells.**

432 HFF (left column) and PPT1-deficient (right column) cells were stained for cathepsin D (green),  
433 LAMP1 (red), and counterstained with DAPI (blue). There were no differences observed in the  
434 signal intensity or spatial distribution of cathepsin D in PPT1-deficient cells compared to the  
435 HFF control. In both cell lines, cathepsin D was found abundantly throughout the cytosol and  
436 was not localized exclusively to the lysosome (indicated by LAMP1-positive structures). White  
437 arrows show vacuoles in the cytosol of PPT- deficient cells. Vacuoles were identified in 43.6%  
438 of PPT1-deficient fibroblasts (n = 78), but only 14.1% of HFF (n = 78) controls. Of the cells  
439 which had visible vacuoles, the number of vacuoles was also increased to an average of 5 per cell  
440 in PPT1- deficient cells versus 2 per cell in the HFF control. Images are at 40X magnification.

441

442 **PPT1-deficient fibroblasts were more susceptible to H<sub>2</sub>O<sub>2</sub>-induced cell death**

443 The abnormalities found in the mitochondrial network were suggestive of mitochondrial  
444 dysfunction [36], which is known to lead to increased ROS production [30]. We then tested  
445 whether PPT1-deficient cells would be more susceptible to cell death induced by exogenous  
446 ROS, as expected if pre-existing endogenous ROS were present. H<sub>2</sub>O<sub>2</sub> is a ROS with biological  
447 significance [37], and treatment with exogenous H<sub>2</sub>O<sub>2</sub> is a well-established assay known to  
448 induce apoptosis in a dose-dependent manner [38, 39]. HFF and PPT1-deficient cells were  
449 treated with increasing concentrations of 0 to 100 micromolar H<sub>2</sub>O<sub>2</sub> for 24 hours in order to  
450 examine susceptibility to oxidative damage by ROS (n = 5 wells per cell line per dose treatment).  
451 Control cell viability declined in a dose-dependent manner with increasing H<sub>2</sub>O<sub>2</sub> concentrations.  
452 In contrast, PPT1-deficient cell viability was mostly depleted at all tested H<sub>2</sub>O<sub>2</sub> concentration. A  
453 univariate ANOVA revealed a significant group x dose effect (p < 0.001); however, group and  
454 dose effects individually were not found to be significant (p = 0.071 and 0.054, respectively) (Fig  
455 9A).

456

457 **Fig 9A. PPT1-deficient fibroblasts are more susceptible to hydrogen peroxide (H<sub>2</sub>O<sub>2</sub>)**  
458 **induced cell death.**

459 HFF and PPT1-deficient fibroblasts were treated with 0, 25, 50, or 100 μM H<sub>2</sub>O<sub>2</sub> for 24 hours.  
460 Cell viability was determined by MTT assay. PPT1-deficient cells displayed 8%, 3%, 3% of  
461 control viability with the increasing concentrations of 25, 50, and 100 μM H<sub>2</sub>O<sub>2</sub>, respectively.  
462 HFF cells displayed 62%, 51%, and 41% of control viability under the same respective  
463 conditions. A significant group x dose effect was determined by ANOVA (p < 0.001). Group and  
464 dose effects individually were not significant (p = 0.071 and 0.054, respectively). Error bars  
465 display +SD.

466

467           We also measured endogenous ROS levels in our four conditioned groups 1-4 to  
468 ascertain whether the presence of PPT1 in conditioned media had a positive influence on the  
469 patient cell's susceptibility to H<sub>2</sub>O<sub>2</sub> induced cell death. Results indicated while significantly  
470 elevated ( $p < 0.01$ ) relative luminescence units, an indicator for ROS, were detected between  
471 both PPT1-deficient groups 3 and 4 as compared to wild type groups 1 and 2, there were not  
472 significant difference in the levels of reactive oxygen species whether PPT1 patient cells were  
473 grown in wild type (group 3) or PPT1 conditioned media (group 4) (Fig 9B).

474

475 **Fig 9B. Detection of reactive oxygen species in four conditioned media groups.**

476 Intracellular levels of ROS were measured, in relative luminescence units (RLU), using a  
477 Spectramax M5 plate reader. A significant increase (\*,  $p < 0.01$ ) in ROS was found in both PT  
478 cell groups compared to WT cells. Error bars represent +/- SD.

479

480 **The cytoskeleton of PPT1-deficient fibroblasts is morphologically normal**

481           Inhibition of pathways responsible for microtubule assembly has been shown to lead to  
482 the accumulation of autofluorescence storage material in the lysosome [21], suggesting an  
483 association between components of the cytoskeleton and the lysosome. We examined various  
484 components of the cytoskeleton to assess where any distinct morphological abnormalities are  
485 observed in PPT1-deficient cells as compared to control cells. Vimentin, a mesenchymal specific  
486 intermediate filament, appeared morphologically normal when compared to HFF control cells, as  
487 also the microtubule (Supplementary Fig S1). Similarly, the polymerized actin assembly also  
488 appeared normal in PPT1-deficient cells (Supplementary Fig S2).

489

490 **Supplementary Fig S1. beta-tubulin and vimentin components of the cytoskeleton of PPT1-**  
491 **deficient and normal HFF fibroblasts are indistinguishable.**

492 HFF (top row) and PPT1 deficient (bottom row) fibroblasts were probed for vimentin (green),  
493 beta-tubulin (red) and counterstained with DAPI (blue). There were no differences observed in  
494 the vimentin or beta-tubulin distribution of PPT1-deficient and normal fibroblast cells (merged).

495

496 **Supplementary Fig S2. Wild type fibroblasts and PPT deficient fibroblasts exhibit normal**  
497 **actin distribution.** Cells were stained with LAMP1 (red) and Phalloidin (green).

498

## 499 **DISCUSSION**

500 Our study describes a detailed characterization of PPT1-deficient fibroblasts derived from a  
501 patient with INCL demonstrating that: (a) autofluorescence storage material was present in  
502 human fibroblast cells deficient in PPT1 at a level that is higher than wild type; (b) There were  
503 organellar pathologies in PPT1-deficient cells, specifically involving the number and distribution  
504 of the lysosomal compartments and the mitochondrial network; (c) PPT1-deficient cells had a  
505 heightened susceptibility to ROS-induced cell death; (d) There is an increase in LAMP1-positive  
506 vacuolation; and (e) The cytoskeleton system, intermediate filaments, microtubules, and actin,  
507 were morphologically normal in PPT1-deficient cells indicating that the INCL pathology is  
508 discreet and specific to abnormal lysosomal and mitochondrial networks.

509 Although GRODs are typically detected by electron microscopy [9, 20, 23], we report the  
510 detection of autofluorescence storage material in PPT1 deficient fibroblasts using standard  
511 fluorescence microscopy - a method similarly used in PPT1-deficient lymphocytes [21], and in

512 brain sections of INCL mice [13]. The presence of autofluorescence storage material also has  
513 been reported in TPP1 and CLN3-deficient neural progenitor cells of late-infantile NCL and  
514 juvenile NCL [40]. We confirmed the intralysosomal location of autofluorescence storage  
515 material in PPT1-deficient patient cells by the co-localization of LAMP1 and autofluorescence  
516 signals. This increased autofluorescence accumulation correlates with significantly reduced  
517 PPT1-deficient patient cell viability as compared to either fibroblast control cell lines. However,  
518 we observed that there are marked differences in cell viability between the MRC-5 and HFF  
519 control fibroblasts, most likely due to specificity and robustness of each control fibroblast cell  
520 lines. It should also be noted that the PPT1-deficient cells are untransformed and thus are not as  
521 robust as either HFF or MRC-5 which may also impact cell viability. It can also be argued that  
522 the observed difference reflects levels of metabolic activity rather than direct cell viability.  
523 Because the MTT assay uses cell metabolism as an indicator for viability [33], substantial  
524 metabolic differences could produce findings which may or may not accurately reflect viability.  
525 If this was the case, we believe that decreased metabolic activity reflects a compromised  
526 cytosolic state which would eventually lead to lowered cell viability.  
527 Increased lysosomal staining intensity in PPT1-deficient fibroblasts was first reported using the  
528 lysosomal marker LysoTracker suggesting an altered pattern of mitochondrial network [26].  
529 Consistent with these findings, we also observed increased staining intensity. Additionally, using  
530 LAMP1, we observed a significant increase - three to four folds - in the number of lysosomal  
531 structures, as well as dense distribution and localization of the lysosomes beyond the perinuclear  
532 region. This indicates that substantially more lysosomal compartments were present in the PPT1-  
533 deficient fibroblasts, not just an increase in intensity due to abnormal accumulation and  
534 distribution. It has been reported that PPT1 deficiency is closely linked with ER stress and



535 subsequent activation of the ER UPR [10, 18]. PERK is known to play a key role in the  
536 activation of the UPR [17], and the transcription factors TFEB and TFE3 have recently been  
537 shown to activate lysosome biogenesis in a PERK-dependent manner [41]. The significant  
538 increase in lysosomal compartments observed in our study may then represent evidence of  
539 increased lysosomal biogenesis due to activation of the UPR, which supports the role for the ER  
540 in INCL pathology reported previously [10, 17, 18]. Lysosome biogenesis occurred in a PERK  
541 dependent manner which mediates ROS production and activation of mitochondrial-mediated  
542 apoptosis in response to ER stress [17].

543 Our data supports the role of mitochondrial damage in INCL pathology. We observed  
544 altered morphology of the mitochondrial network consisting of fragmented mitochondrial tubules  
545 and the loss of mitochondrial tubule formation, all of which are indicative of mitochondrial  
546 dysfunction. Large spherical mitochondria can arise due to impairment affecting the  
547 mitochondrial architecture at the nanoscale [36], and we have observed the spherical punctate  
548 mitochondrial morphology in PPT1-deficient patient cells. Since mitochondrial damage and  
549 subsequent caspase-9-initiated apoptosis have been implicated in INCL mouse model, and were  
550 shown to be ROS-dependent [16], we next sought to investigate whether evidence for ROS  
551 existed in PPT1-deficient human fibroblasts. Although ROS has been detected using a PPT1 KO  
552 mouse model [10], ROS has not yet been reported in human cells or non-neuronal cell types. Our  
553 results indicate that PPT1-deficient human fibroblasts exhibit a heightened susceptibility to cell  
554 death induced by exogenous ROS. This is highly suggestive that elevated pre-existing  
555 endogenous ROS are already present in PPT1-deficient patient cells.

556 To determine whether mitochondrial dysfunction could further impair lysosomal function, we  
557 assessed the intracellular distribution of cathepsin D and the presence of large vacuole formation

558 from LAMP1-positive cells. Interestingly, cathepsin D was found abundantly throughout both  
559 PPT1-deficient and control cells. By qualitative analysis, there were no differences in the spatial  
560 distribution or expression of cathepsin D. Previously work has shown that cathepsin D is  
561 involved in early stages of the mitochondrial-mediated apoptotic cascade [42]. Cathepsin D-  
562 deficiency has also been shown to lead to the accumulation of autofluorescence storage material  
563 and progressive cell death, characteristic of the NCLs in general [42, 43]. We find no correlation  
564 with cathepsin D density and distribution and mitochondrial dysfunction. Since vacuolization is  
565 ROS independent and has no morphological effects on the mitochondrial network [32], the  
566 vacuolization observed in PPT1-deficient fibroblasts may represent a direct effect of  
567 autofluorescence storage material accumulation on lysosome function rather than a complex  
568 interaction with the mitochondria.

569 Finally, our work indicates that the loss of PPT1 enzymatic activity can be somewhat  
570 mitigated with the introduction of wild type PPT1 enzyme in the cytosol. This method was first  
571 reported as a potential enzyme replacement therapy for the lysosomal storage disorder  
572 Mucopolysaccharidosis IVA [31] and may yet be a similarly viable avenue for INCL. Using this  
573 paradigm, we ask whether the media collected from wild type cultures and PPT1-deficient  
574 cultures have a positive or negative effect on wild type and PPT1-deficient patient fibroblasts.  
575 The introduction of a functional enzyme secreted from wild type conditioned media may restore  
576 normal enzyme activity by the observable reduction in autofluorescence storage materials.  
577 Alternatively, patient conditioned media when added to wild-type cultures, may provoke an  
578 abnormal phenotype due to the presence of secreted toxic factors. Our data indicates that the  
579 patient cells benefitted from growing in the presence of wild type conditioned media: there are  
580 dramatic reductions in autofluorescence accumulation and LAMP1 positive lysosomes as

581 compared to patient cells grown in their own conditioned media. Although cellular pathology  
582 was partially mitigated, restoration was not at the wild type level. Levels of reactive oxygen  
583 species were at comparably high levels whether PPT1-deficient fibroblast cells were grown in  
584 wild type or PPT1-deficient conditioned media. These results indicate that complete rescue most  
585 likely requires constitutive intracellular expression of PPT1 via a gene therapy vector or the  
586 direct introduction of the enzyme to the brain or spinal cord. Currently, enzyme replacement  
587 therapies for CLN diseases are invasive: intrathecal and intravenous administration of PPT1 in  
588 the Ppt1-mouse model spinal cord, and the intracerebroventricularly administration of TPP1  
589 enzyme for the treatment of NCL type 2 [1, 44, 45]. Our study indicates that normal PPT1  
590 enzyme can be internalized by PPT1-deficient cells and be taken up by the lysosomes to repress  
591 autofluorescence accumulation and abnormal lysosomal morphology. This paradigm has clinical  
592 significance in that a partial cellular recovery may be possible using this passive method.

593

## 594 **Acknowledgments**

595 We would like to thank Union College Undergraduate Funding resources.

## 596 **References**

- 597 1. Mole SE, Anderson G, Band HA, Berkovic SF, Cooper JD, Kleine Holthaus SM, et al.  
598 Clinical challenges and future therapeutic approaches for neuronal ceroid lipofuscinosis. *Lancet*  
599 *Neurol.* 2019;18(1):107-16. Epub 2018/11/25. doi: 10.1016/S1474-4422(18)30368-5. PubMed  
600 PMID: 30470609.
- 601 2. Mole SE, Mitchison HM, Munroe PB. Molecular basis of the neuronal ceroid  
602 lipofuscinoses: mutations in CLN1, CLN2, CLN3, and CLN5. *Hum Mutat.* 1999;14(3):199-215.  
603 Epub 1999/09/08. doi: 10.1002/(SICI)1098-1004(1999)14:3<199::AID-HUMU3>3.0.CO;2-A.  
604 PubMed PMID: 10477428.
- 605
- 606 3. Vanhanen SL, Puranen J, Autti T, Raininko R, Liewendahl K, Nikkinen P, et al.  
607 Neuroradiological findings (MRS, MRI, SPECT) in infantile neuronal ceroid-lipofuscinosis

- 608 (infantile CLN1) at different stages of the disease. *Neuropediatrics*. 2004;35(1):27-35. Epub  
609 2004/03/06. doi: 10.1055/s-2004-815788. PubMed PMID: 15002049.
- 610
- 611 4. Lyly A, von Schantz C, Salonen T, Kopra O, Saarela J, Jauhiainen M, et al.  
612 Glycosylation, transport, and complex formation of palmitoyl protein thioesterase 1 (PPT1)--  
613 distinct characteristics in neurons. *BMC Cell Biol*. 2007;8:22. Epub 2007/06/15. doi:  
614 10.1186/1471-2121-8-22. PubMed PMID: 17565660; PubMed Central PMCID:  
615 PMCPMC1906764.
- 616
- 617 5. Tamaki SJ, Jacobs Y, Dohse M, Capela A, Cooper JD, Reitsma M, et al. Neuroprotection  
618 of host cells by human central nervous system stem cells in a mouse model of infantile neuronal  
619 ceroid lipofuscinosis. *Cell Stem Cell*. 2009;5(3):310-9. Epub 2009/09/08. doi:  
620 10.1016/j.stem.2009.05.022. PubMed PMID: 19733542.
- 621
- 622 6. Geraets RD, Koh S, Hastings ML, Kielian T, Pearce DA, Weimer JM. Moving towards  
623 effective therapeutic strategies for Neuronal Ceroid Lipofuscinosis. *Orphanet J Rare Dis*.  
624 2016;11:40. Epub 2016/04/17. doi: 10.1186/s13023-016-0414-2. PubMed PMID: 27083890;  
625 PubMed Central PMCID: PMCPMC4833901.
- 626
- 627 7. Dearborn JT, Harmon SK, Fowler SC, O'Malley KL, Taylor GT, Sands MS, et al.  
628 Comprehensive functional characterization of murine infantile Batten disease including  
629 Parkinson-like behavior and dopaminergic markers. *Sci Rep*. 2015;5:12752. Epub 2015/08/05.  
630 doi: 10.1038/srep12752. PubMed PMID: 26238334; PubMed Central PMCID:  
631 PMCPMC4523849.
- 632
- 633 8. Santavuori P, Lauronen L, Kirveskari K, Aberg L, Sainio K. Neuronal ceroid  
634 lipofuscinoses in childhood. *Suppl Clin Neurophysiol*. 2000;53:443-51. Epub 2003/05/14. doi:  
635 10.1016/s1567-424x(09)70193-x. PubMed PMID: 12741032.
- 636
- 637 9. Gupta P, Soyombo AA, Atashband A, Wisniewski KE, Shelton JM, Richardson JA, et al.  
638 Disruption of PPT1 or PPT2 causes neuronal ceroid lipofuscinosis in knockout mice. *Proc Natl*  
639 *Acad Sci U S A*. 2001;98(24):13566-71. Epub 2001/11/22. doi: 10.1073/pnas.251485198.  
640 PubMed PMID: 11717424; PubMed Central PMCID: PMCPMC61081.
- 641
- 642 10. Kim SJ, Zhang Z, Hitomi E, Lee YC, Mukherjee AB. Endoplasmic reticulum stress-  
643 induced caspase-4 activation mediates apoptosis and neurodegeneration in INCL. *Hum Mol*  
644 *Genet*. 2006;15(11):1826-34. Epub 2006/04/29. doi: 10.1093/hmg/ddl105. PubMed PMID:  
645 16644870.
- 646 11. Lyly A, Marjavaara SK, Kyttala A, Uusi-Rauva K, Luiro K, Kopra O, et al. Deficiency of  
647 the INCL protein Ppt1 results in changes in ectopic F1-ATP synthase and altered cholesterol  
648 metabolism. *Hum Mol Genet*. 2008;17(10):1406-17. Epub 2008/02/05. doi:  
649 10.1093/hmg/ddn028. PubMed PMID: 18245779.
- 650
- 651 12. Khaibullina A, Kenyon N, Guptill V, Quezado MM, Wang L, Koziol D, et al. In a model  
652 of Batten disease, palmitoyl protein thioesterase-1 deficiency is associated with brown adipose  
653 tissue and thermoregulation abnormalities. *PLoS One*. 2012;7(11):e48733. Epub 2012/11/10.

- 654 doi: 10.1371/journal.pone.0048733. PubMed PMID: 23139814; PubMed Central PMCID:  
655 PMCPMC3490854.
- 656
- 657 13. Miller JN, Kovacs AD, Pearce DA. The novel Cln1(R151X) mouse model of infantile  
658 neuronal ceroid lipofuscinosis (INCL) for testing nonsense suppression therapy. *Hum Mol*  
659 *Genet.* 2015;24(1):185-96. Epub 2014/09/11. doi: 10.1093/hmg/ddu428. PubMed PMID:  
660 25205113; PubMed Central PMCID: PMCPMC4326326.
- 661
- 662 14. Getty AL, Benedict JW, Pearce DA. A novel interaction of CLN3 with nonmuscle  
663 myosin-IIb and defects in cell motility of Cln3(-/-) cells. *Exp Cell Res.* 2011;317(1):51-69. Epub  
664 2010/09/21. doi: 10.1016/j.yexcr.2010.09.007. PubMed PMID: 20850431; PubMed Central  
665 PMCID: PMCPMC4124749.
- 666
- 667 15. Jalanko A, Braulke T. Neuronal ceroid lipofuscinoses. *Biochim Biophys Acta.*  
668 2009;1793(4):697-709. Epub 2008/12/17. doi: 10.1016/j.bbamcr.2008.11.004. PubMed PMID:  
669 19084560.
- 670
- 671 16. Kim SJ, Zhang Z, Lee YC, Mukherjee AB. Palmitoyl-protein thioesterase-1 deficiency  
672 leads to the activation of caspase-9 and contributes to rapid neurodegeneration in INCL. *Hum*  
673 *Mol Genet.* 2006;15(10):1580-6. Epub 2006/03/31. doi: 10.1093/hmg/ddl078. PubMed PMID:  
674 16571600.
- 675
- 676 17. Marotta D, Tinelli E, Mole SE. NCLs and ER: A stressful relationship. *Biochim Biophys*  
677 *Acta Mol Basis Dis.* 2017;1863(6):1273-81. Epub 2017/04/10. doi:  
678 10.1016/j.bbdis.2017.04.003. PubMed PMID: 28390949; PubMed Central PMCID:  
679 PMCPMC5479446.
- 680
- 681 18. Zhang Z, Lee YC, Kim SJ, Choi MS, Tsai PC, Xu Y, et al. Palmitoyl-protein  
682 thioesterase-1 deficiency mediates the activation of the unfolded protein response and neuronal  
683 apoptosis in INCL. *Hum Mol Genet.* 2006;15(2):337-46. Epub 2005/12/22. doi:  
684 10.1093/hmg/ddi451. PubMed PMID: 16368712.
- 685
- 686 19. Getty AL, Pearce DA. Interactions of the proteins of neuronal ceroid lipofuscinosis: clues  
687 to function. *Cell Mol Life Sci.* 2011;68(3):453-74. Epub 2010/08/04. doi: 10.1007/s00018-010-  
688 0468-6. PubMed PMID: 20680390; PubMed Central PMCID: PMCPMC4120758.
- 689
- 690 20. Sarkar C, Chandra G, Peng S, Zhang Z, Liu A, Mukherjee AB. Neuroprotection and  
691 lifespan extension in Ppt1(-/-) mice by NtBuHA: therapeutic implications for INCL. *Nat*  
692 *Neurosci.* 2013;16(11):1608-17. Epub 2013/09/24. doi: 10.1038/nn.3526. PubMed PMID:  
693 24056696; PubMed Central PMCID: PMCPMC3812271.
- 694
- 695 21. Seehafer SS, Pearce DA. Spectral properties and mechanisms that underlie  
696 autofluorescent accumulations in Batten disease. *Biochem Biophys Res Commun.*  
697 2009;382(2):247-51. Epub 2009/03/03. doi: 10.1016/j.bbrc.2009.02.099. PubMed PMID:  
698 19248764; PubMed Central PMCID: PMCPMC4123116.
- 699

- 700 22. Wisniewski KE, Kida E, Golabek AA, Kaczmarek W, Connell F, Zhong N. Neuronal  
701 ceroid lipofuscinoses: classification and diagnosis. *Adv Genet.* 2001;45:1-34. Epub 2001/05/03.  
702 doi: 10.1016/s0065-2660(01)45002-4. PubMed PMID: 11332767.  
703
- 704 23. Sarkar C, Zhang Z, Mukherjee AB. Stop codon read-through with PTC124 induces  
705 palmitoyl-protein thioesterase-1 activity, reduces thioester load and suppresses apoptosis in  
706 cultured cells from INCL patients. *Mol Genet Metab.* 2011;104(3):338-45. Epub 2011/06/28.  
707 doi: 10.1016/j.ymgme.2011.05.021. PubMed PMID: 21704547; PubMed Central PMCID:  
708 PMC3220191.  
709
- 710 24. Das AK, Lu JY, Hofmann SL. Biochemical analysis of mutations in palmitoyl-protein  
711 thioesterase causing infantile and late-onset forms of neuronal ceroid lipofuscinosis. *Hum Mol*  
712 *Genet.* 2001;10(13):1431-9. Epub 2001/07/07. doi: 10.1093/hmg/10.13.1431. PubMed PMID:  
713 11440996.  
714
- 715 25. Das AK, Becerra CH, Yi W, Lu JY, Siakotos AN, Wisniewski KE, et al. Molecular  
716 genetics of palmitoyl-protein thioesterase deficiency in the U.S. *J Clin Invest.* 1998;102(2):361-  
717 70. Epub 1998/07/17. doi: 10.1172/JCI3112. PubMed PMID: 9664077; PubMed Central  
718 PMCID: PMC3220191.  
719
- 720 26. Pezzini F, Gismondi F, Tessa A, Tonin P, Carrozzo R, Mole SE, et al. Involvement of the  
721 mitochondrial compartment in human NCL fibroblasts. *Biochem Biophys Res Commun.*  
722 2011;416(1-2):159-64. Epub 2011/11/22. doi: 10.1016/j.bbrc.2011.11.016. PubMed PMID:  
723 22100646.  
724
- 725 27. Demers-Lamarche J, Guillebaud G, Tlili M, Todkar K, Belanger N, Grondin M, et al.  
726 Loss of Mitochondrial Function Impairs Lysosomes. *J Biol Chem.* 2016;291(19):10263-76. Epub  
727 2016/03/19. doi: 10.1074/jbc.M115.695825. PubMed PMID: 26987902; PubMed Central  
728 PMCID: PMC3220191.  
729
- 730 28. Mukherjee AB, Appu AP, Sadhukhan T, Casey S, Mondal A, Zhang Z, et al. Emerging  
731 new roles of the lysosome and neuronal ceroid lipofuscinoses. *Mol Neurodegener.* 2019;14(1):4.  
732 Epub 2019/01/18. doi: 10.1186/s13024-018-0300-6. PubMed PMID: 30651094; PubMed Central  
733 PMCID: PMC3220191.  
734
- 735 29. Liu Z, Zhou T, Ziegler AC, Dimitrion P, Zuo L. Oxidative Stress in Neurodegenerative  
736 Diseases: From Molecular Mechanisms to Clinical Applications. *Oxid Med Cell Longev.*  
737 2017;2017:2525967. Epub 2017/08/09. doi: 10.1155/2017/2525967. PubMed PMID: 28785371;  
738 PubMed Central PMCID: PMC3220191.  
739
- 740 30. Safari A, Kolker S, Hoffmann GF, Ebrahimi-Fakhari D. Linking mitochondrial  
741 dysfunction to neurodegeneration in lysosomal storage diseases. *J Inher Metab Dis.*  
742 2017;40(5):631-40. Epub 2017/05/10. doi: 10.1007/s10545-017-0048-0. PubMed PMID:  
743 28477283.  
744



- 745 31. Dvorak-Ewell M, Wendt D, Hague C, Christianson T, Koppaka V, Crippen D, et al.  
746 Enzyme replacement in a human model of mucopolysaccharidosis IVA in vitro and its  
747 biodistribution in the cartilage of wild type mice. *PLoS One*. 2010;5(8):e12194. Epub  
748 2010/09/03. doi: 10.1371/journal.pone.0012194. PubMed PMID: 20808938; PubMed Central  
749 PMCID: PMCPMC2922370.  
750
- 751 32. Chen PM, Gombart ZJ, Chen JW. Chloroquine treatment of ARPE-19 cells leads to  
752 lysosome dilation and intracellular lipid accumulation: possible implications of lysosomal  
753 dysfunction in macular degeneration. *Cell Biosci*. 2011;1(1):10. Epub 2011/06/30. doi:  
754 10.1186/2045-3701-1-10. PubMed PMID: 21711726; PubMed Central PMCID:  
755 PMCPMC3125200.  
756
- 757 33. Janjic D, Wollheim CB. Islet cell metabolism is reflected by the MTT (tetrazolium)  
758 colorimetric assay. *Diabetologia*. 1992;35(5):482-5. Epub 1992/05/01. doi: 10.1007/bf02342448.  
759 PubMed PMID: 1387858.  
760
- 761 34. Marks DC, Belov L, Davey MW, Davey RA, Kidman AD. The MTT cell viability assay  
762 for cytotoxicity testing in multidrug-resistant human leukemic cells. *Leuk Res*.  
763 1992;16(12):1165-73. Epub 1992/12/01. doi: 10.1016/0145-2126(92)90114-m. PubMed PMID:  
764 1361210.  
765
- 766 35. Jaattela M, Cande C, Kroemer G. Lysosomes and mitochondria in the commitment to  
767 apoptosis: a potential role for cathepsin D and AIF. *Cell Death Differ*. 2004;11(2):135-6. Epub  
768 2003/12/03. doi: 10.1038/sj.cdd.4401333. PubMed PMID: 14647234.  
769
- 770 36. Rafelski SM. Mitochondrial network morphology: building an integrative, geometrical  
771 view. *BMC Biol*. 2013;11:71. Epub 2013/06/27. doi: 10.1186/1741-7007-11-71. PubMed PMID:  
772 23800141; PubMed Central PMCID: PMCPMC3691739.  
773
- 774 37. Rigoulet M, Yoboue ED, Devin A. Mitochondrial ROS generation and its regulation:  
775 mechanisms involved in H(2)O(2) signaling. *Antioxid Redox Signal*. 2011;14(3):459-68. Epub  
776 2010/07/24. doi: 10.1089/ars.2010.3363. PubMed PMID: 20649461.  
777
- 778 38. Bladier C, Wolvetang EJ, Hutchinson P, de Haan JB, Kola I. Response of a primary  
779 human fibroblast cell line to H<sub>2</sub>O<sub>2</sub>: senescence-like growth arrest or apoptosis? *Cell Growth*  
780 *Differ*. 1997;8(5):589-98. Epub 1997/05/01. PubMed PMID: 9149910.
- 781 39. Teramoto S, Tomita, T., Matsui, H., Ohga, E., Matsuse, T., & Ouchi, Y. . Hydrogen  
782 peroxide-induced apoptosis and necrosis in human lung fibroblasts: protective roles of  
783 glutathione. . *The Japanese Journal of Pharmacology*. 2001;79:33-40.  
784
- 785 40. Lojewski X, Staropoli JF, Biswas-Legrand S, Simas AM, Haliw L, Selig MK, et al.  
786 Human iPSC models of neuronal ceroid lipofuscinosis capture distinct effects of TPP1 and  
787 CLN3 mutations on the endocytic pathway. *Hum Mol Genet*. 2014;23(8):2005-22. Epub  
788 2013/11/26. doi: 10.1093/hmg/ddt596. PubMed PMID: 24271013; PubMed Central PMCID:  
789 PMCPMC3959814.  
790

- 791 41. Martina JA, Diab HI, Brady OA, Puertollano R. TFEB and TFE3 are novel components  
792 of the integrated stress response. *EMBO J.* 2016;35(5):479-95. Epub 2016/01/28. doi:  
793 10.15252/embj.201593428. PubMed PMID: 26813791; PubMed Central PMCID:  
794 PMCPMC4772850.  
795
- 796 42. Benes P, Vetvicka V, Fusek M. Cathepsin D--many functions of one aspartic protease.  
797 *Crit Rev Oncol Hematol.* 2008;68(1):12-28. Epub 2008/04/09. doi:  
798 10.1016/j.critrevonc.2008.02.008. PubMed PMID: 18396408; PubMed Central PMCID:  
799 PMCPMC2635020.  
800
- 801 43. Myllykangas L, Tyynela J, Page-McCaw A, Rubin GM, Haltia MJ, Feany MB. Cathepsin  
802 D-deficient *Drosophila* recapitulate the key features of neuronal ceroid lipofuscinoses. *Neurobiol*  
803 *Dis.* 2005;19(1-2):194-9. Epub 2005/04/20. doi: 10.1016/j.nbd.2004.12.019. PubMed PMID:  
804 15837574.  
805
- 806 44. Markham A. Cerliponase Alfa: First Global Approval. *Drugs.* 2017;77(11):1247-9. Epub  
807 2017/06/08. doi: 10.1007/s40265-017-0771-8. PubMed PMID: 28589525.  
808
- 809 45. Kohlschutter A, Schulz A, Bartsch U, Storch S. Current and Emerging Treatment  
810 Strategies for Neuronal Ceroid Lipofuscinoses. *CNS Drugs.* 2019;33(4):315-25. Epub  
811 2019/03/17. doi: 10.1007/s40263-019-00620-8. PubMed PMID: 30877620; PubMed Central  
812 PMCID: PMCPMC6440934.  
813



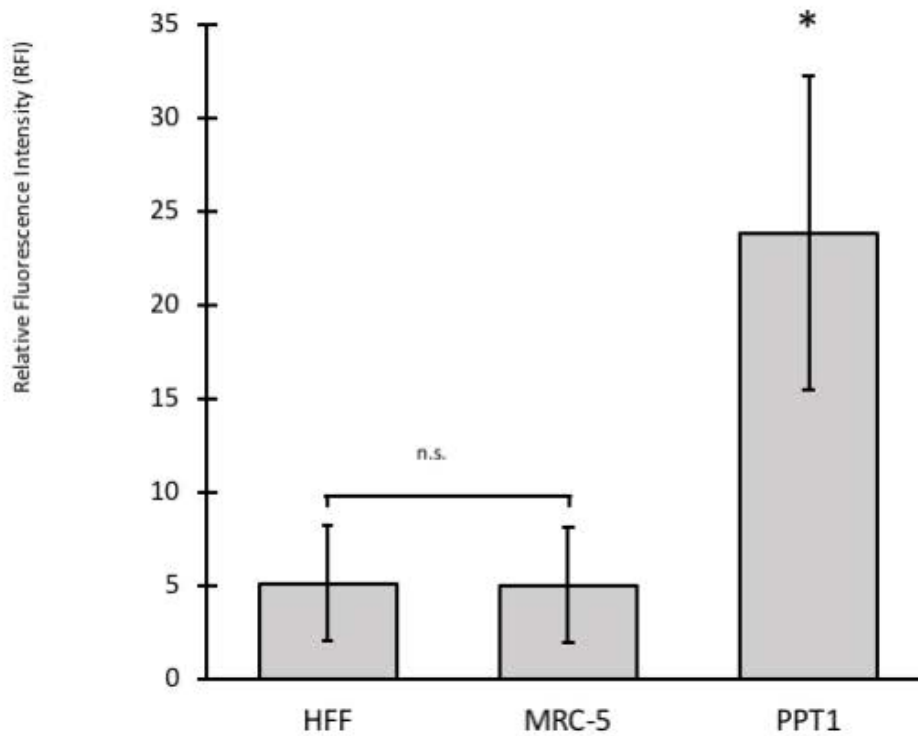

|                     | HFF             | MRC-5           | PPT1                   |
|---------------------|-----------------|-----------------|------------------------|
| Number of cells (n) | 56              | 57              | 52                     |
| Mean $\pm$ SD       | 5.14 $\pm$ 3.08 | 5.05 $\pm$ 3.09 | 23.87 $\pm$ 8.40       |
| Sig. (p value)      | n.s., 0.885     |                 | *, < 0.001,<br>< 0.001 |

A

Viability at 48 Hours

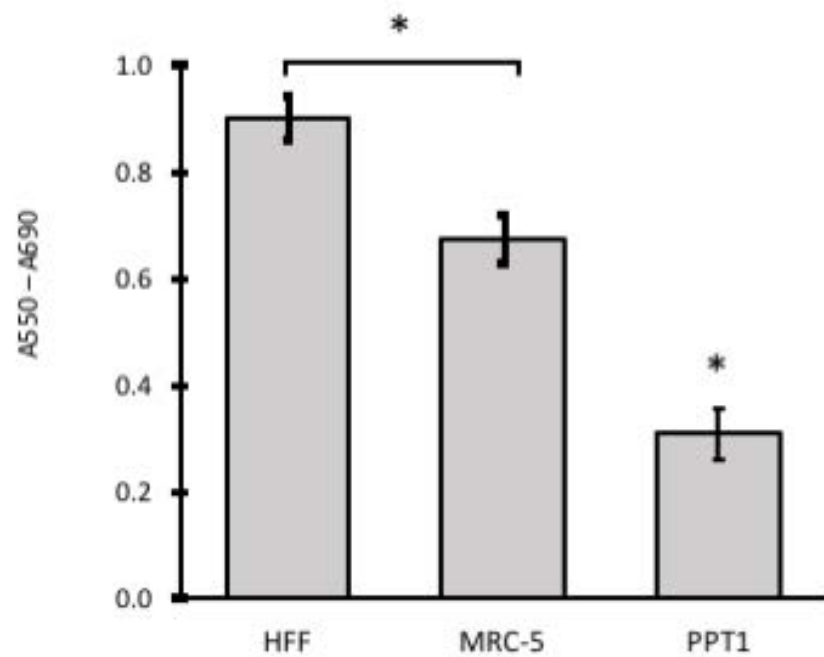

B

Viability at 120 Hours

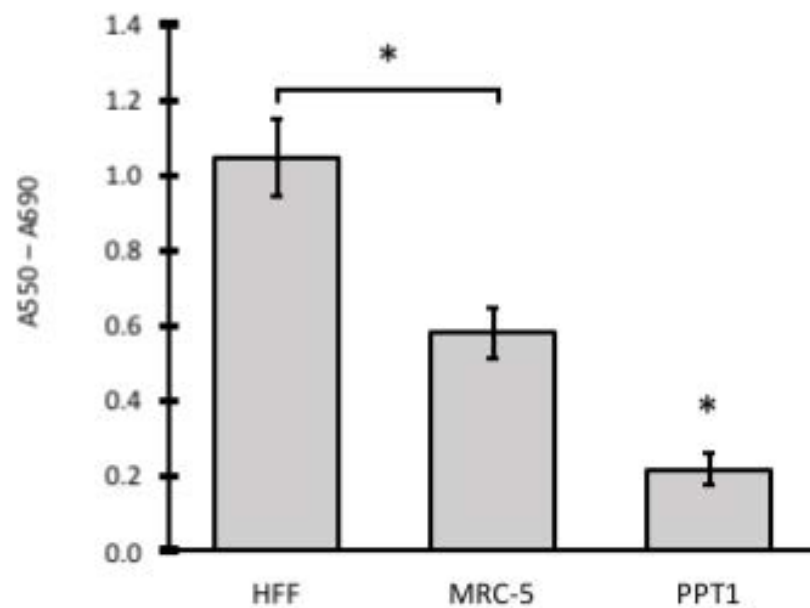

WT (#1)

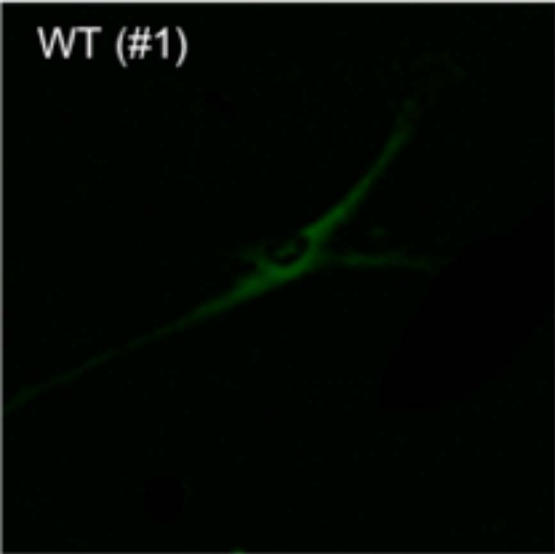

WT + PT media (#2)

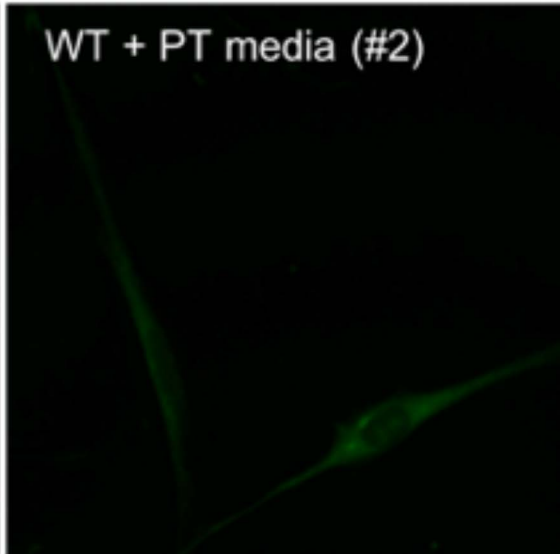

PT + WT media (#3)

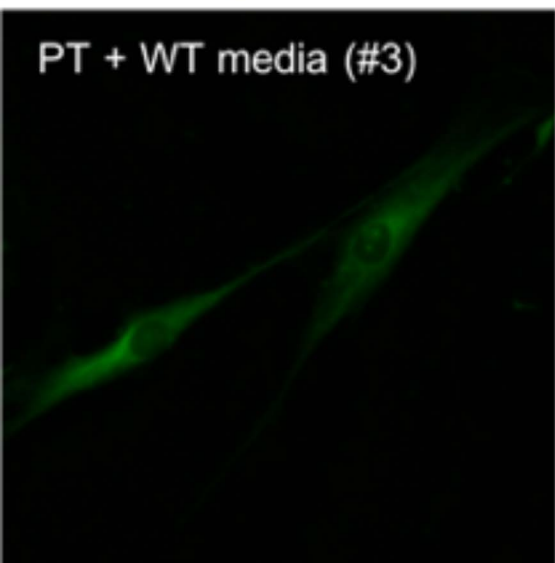

PT (#4)

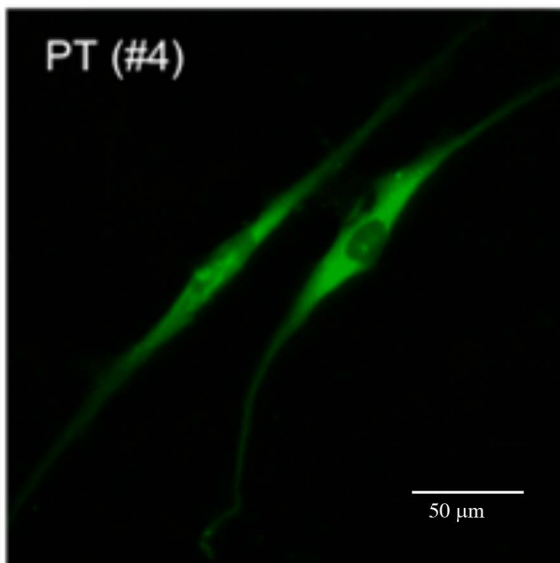

50  $\mu$ m

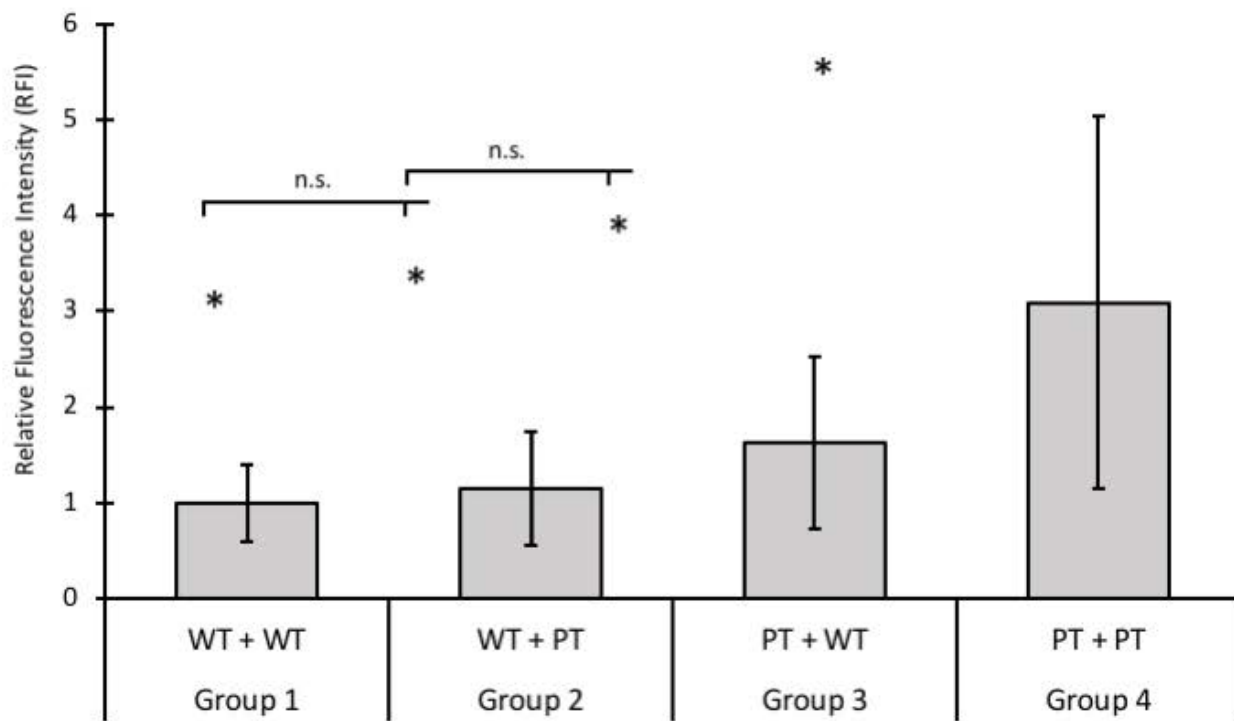

A

HFF

MRC-5

PPT1

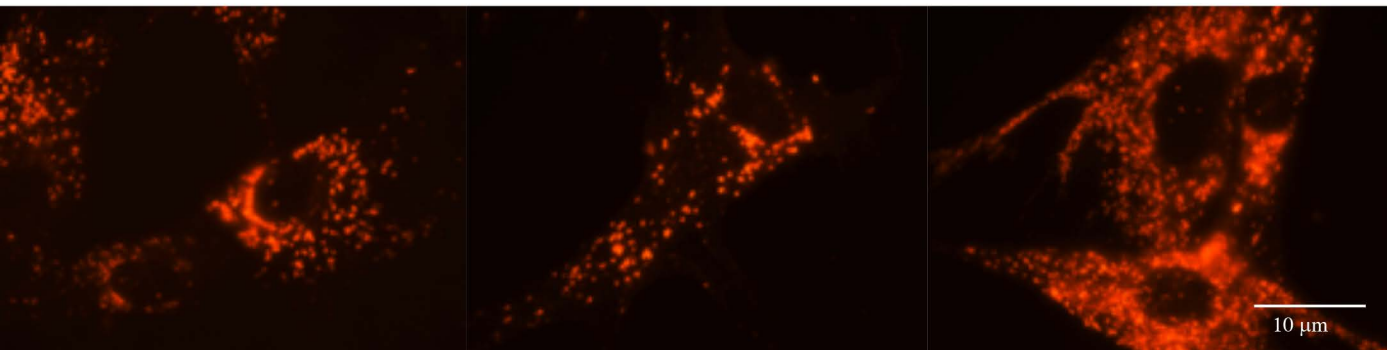

B

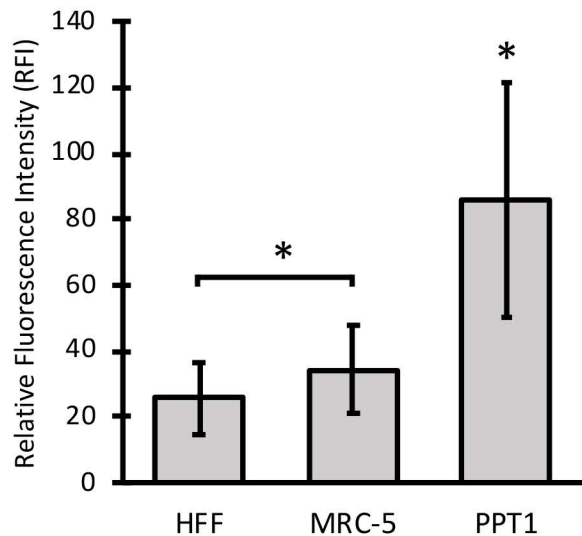

|                     | HFF           | MRC-5         | PPT1          |
|---------------------|---------------|---------------|---------------|
| Number of cells (n) | 114           | 94            | 118           |
| Mean ± SD           | 25.66 ± 10.81 | 34.47 ± 13.16 | 85.79 ± 35.89 |
| Sig. (p value)      | *, p < 0.001  |               |               |

Fig 5A

Wild type

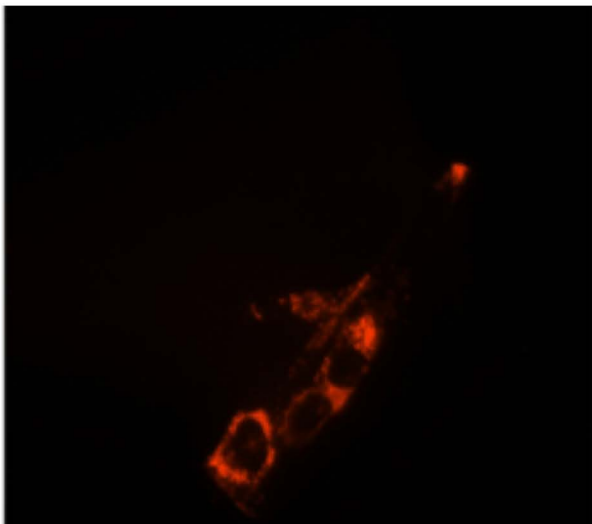

PPT1

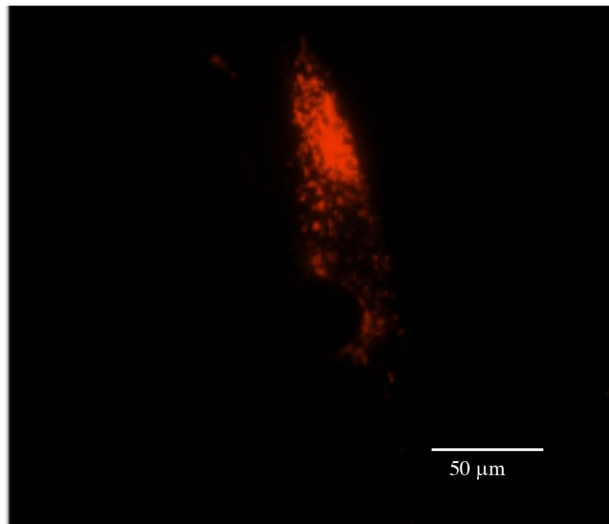

Fig 5B

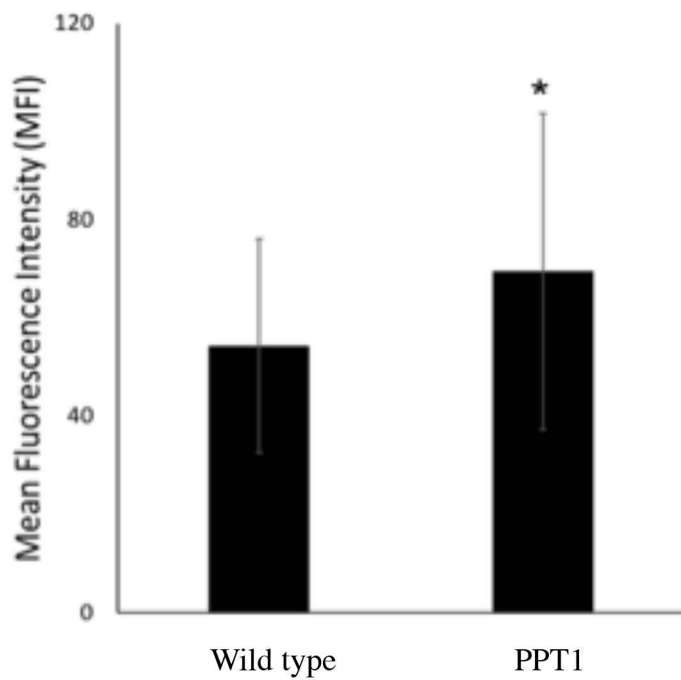

WT (#1)

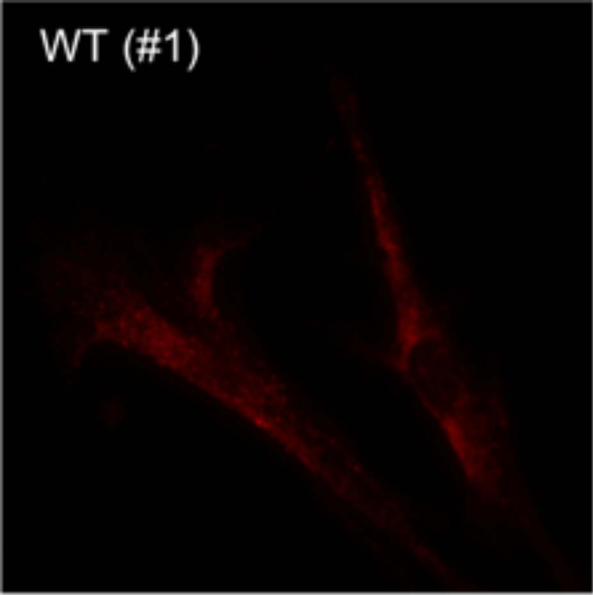

WT + PT media (#2)

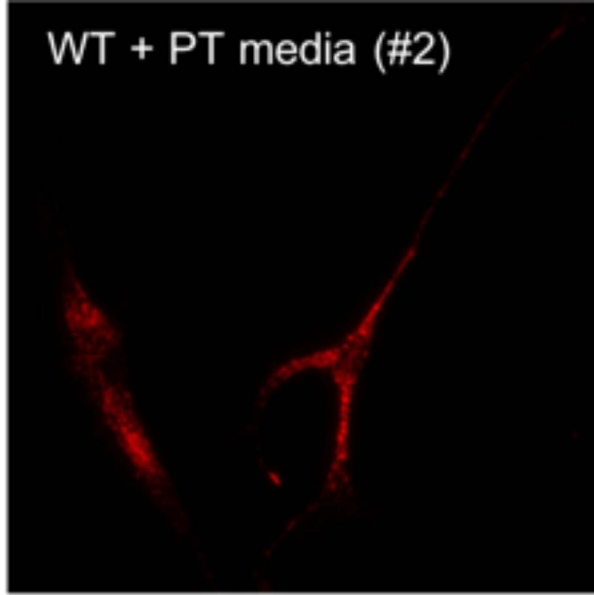

PT + WT media (#3)

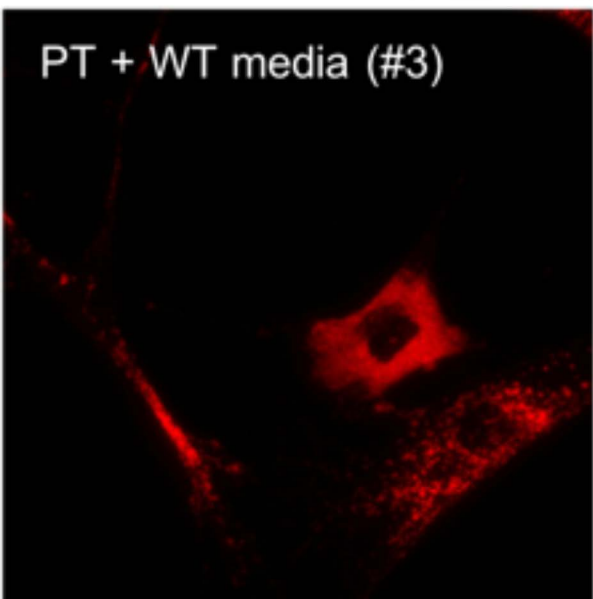

PT (#4)

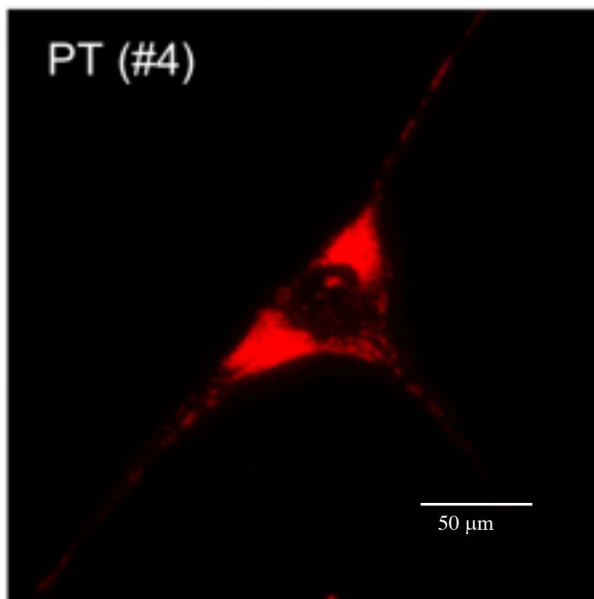

50  $\mu$ m

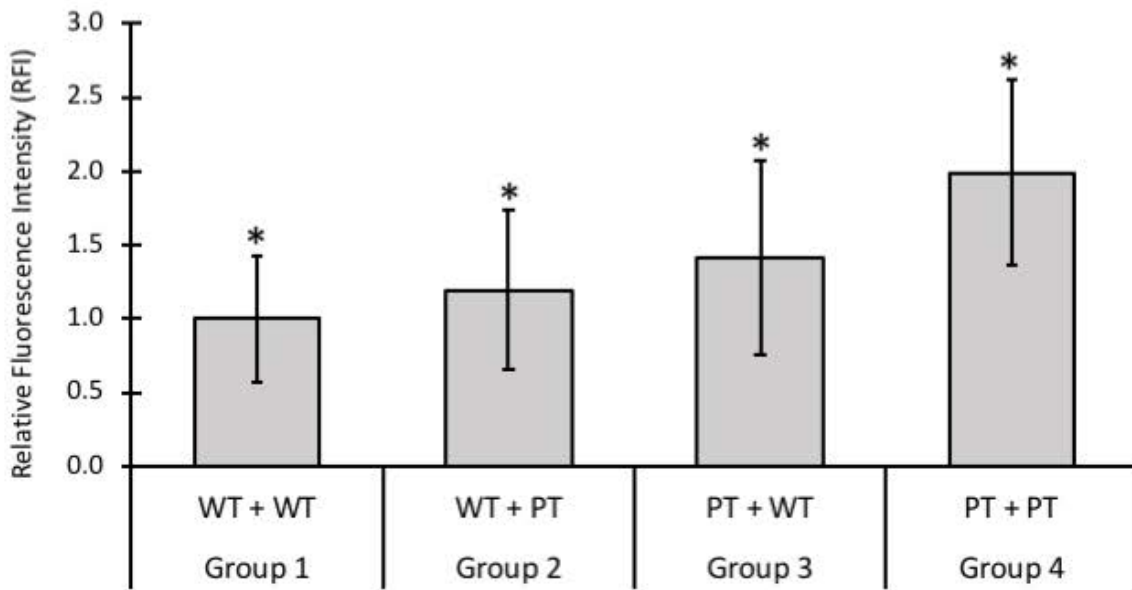



HFF

MRC-5

PPT1

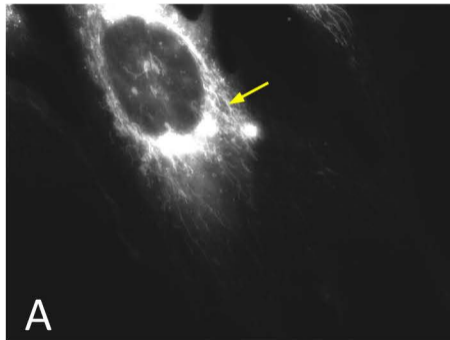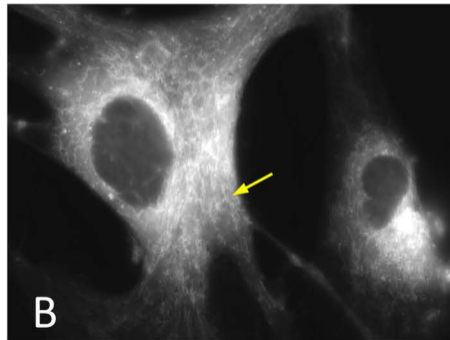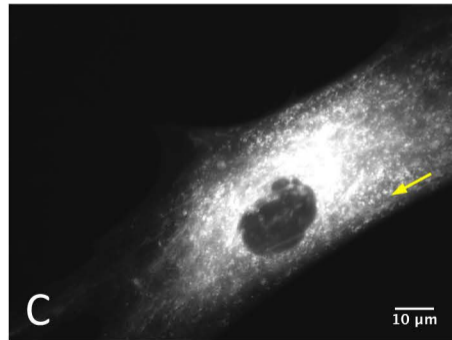

**HFF****PPT1**

Cathepsin D

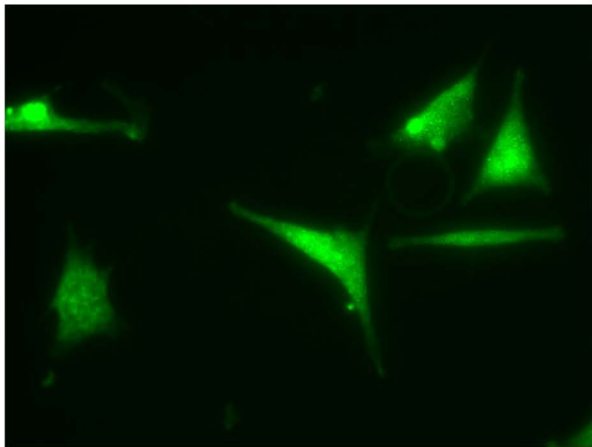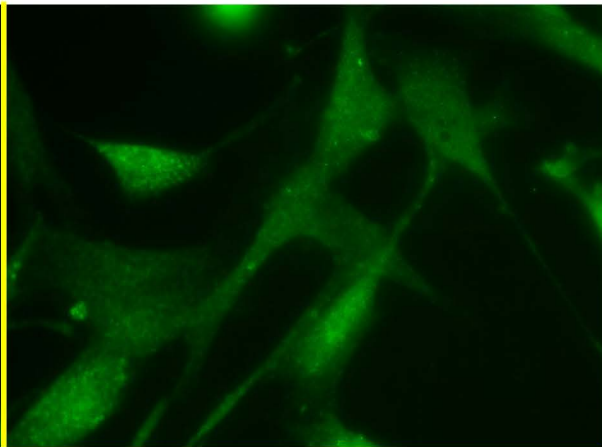

LAMP1

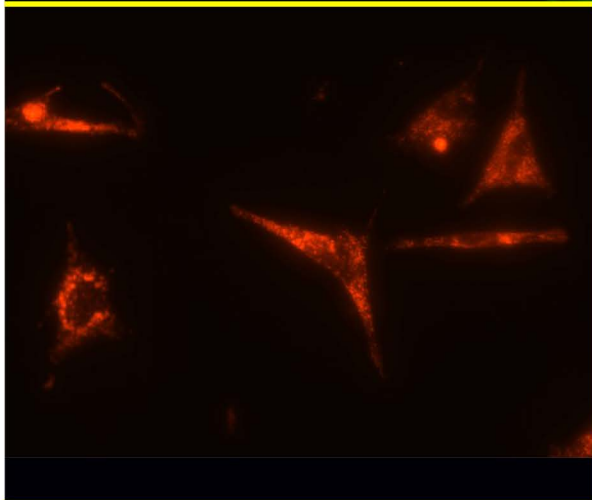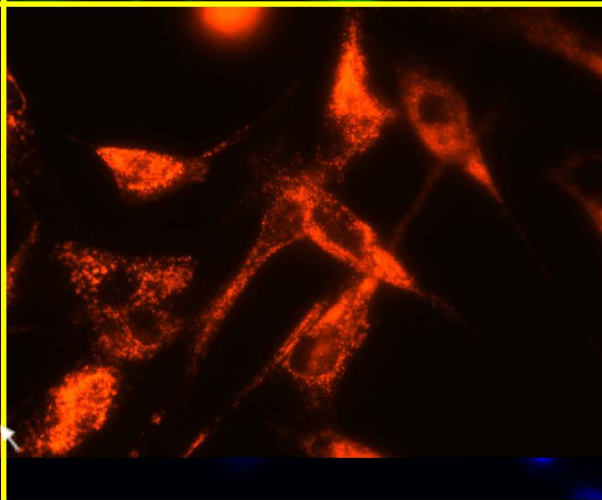

DAPI

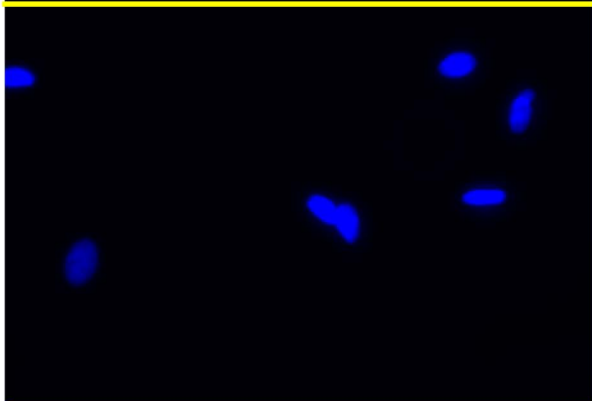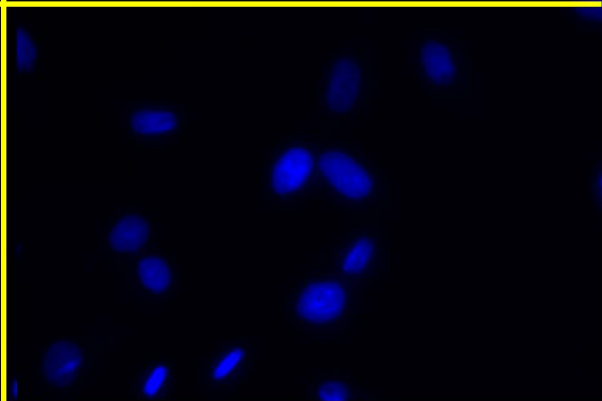

merged

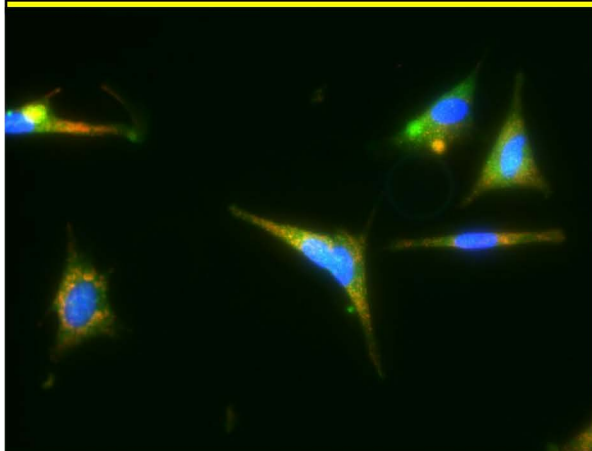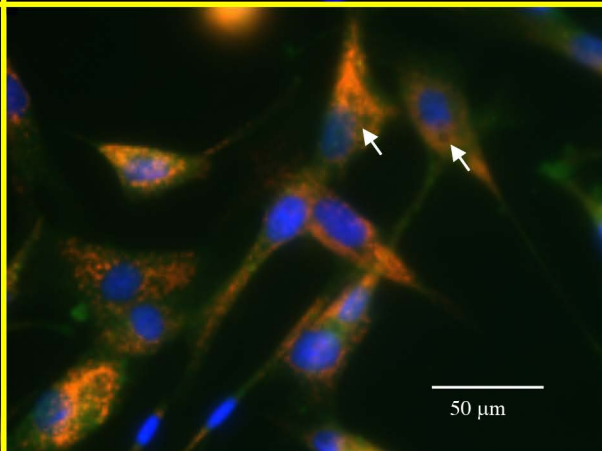

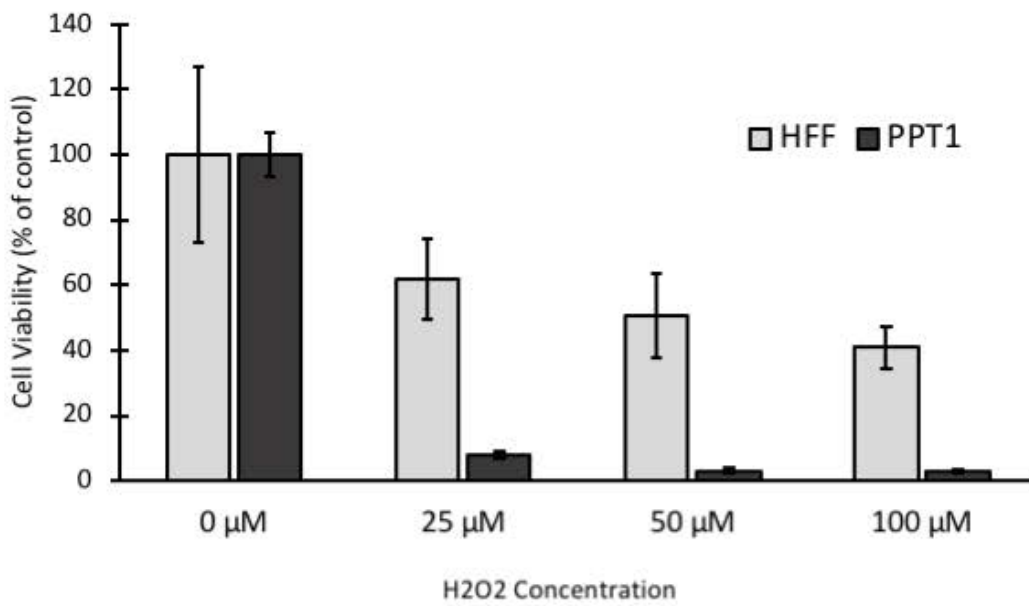

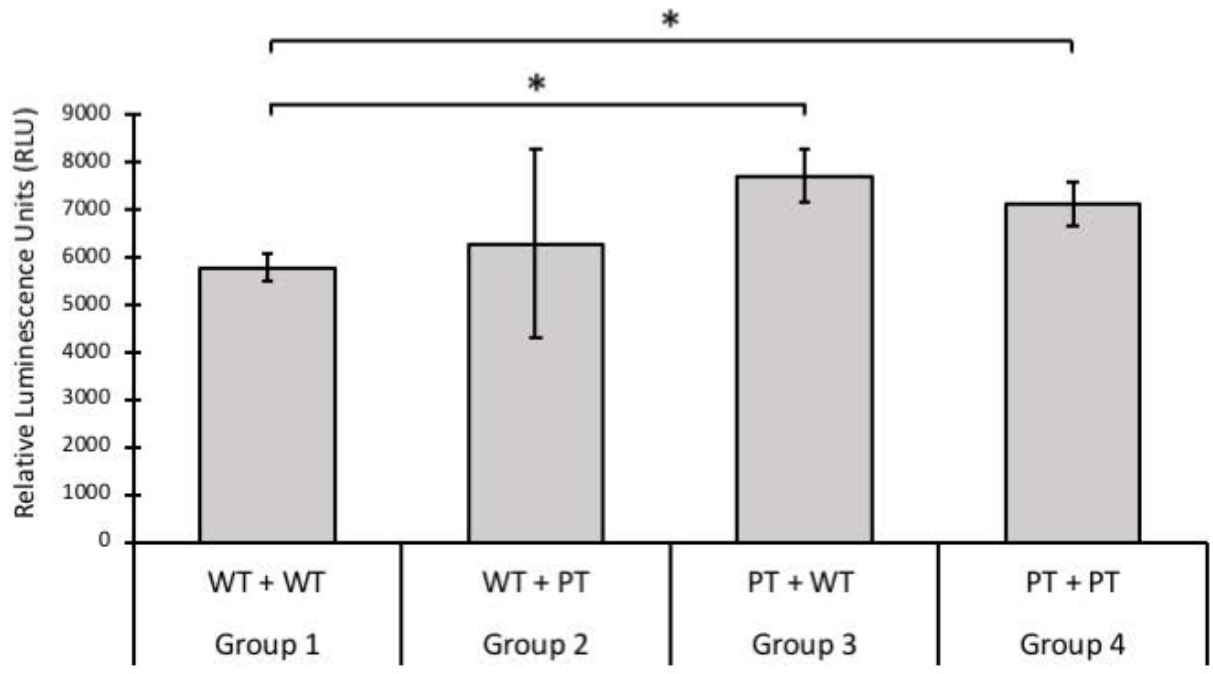

vimentin

beta-tubulin

DAPI

merged

HFF

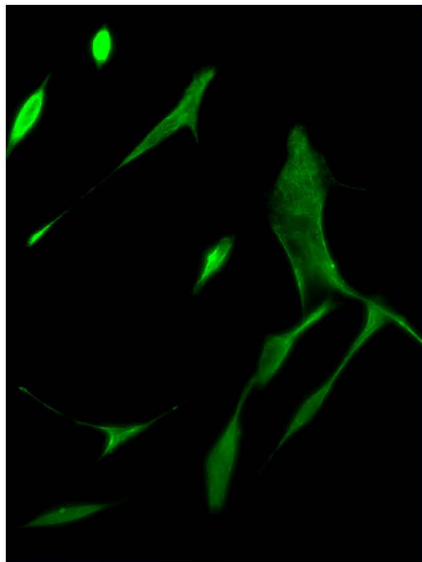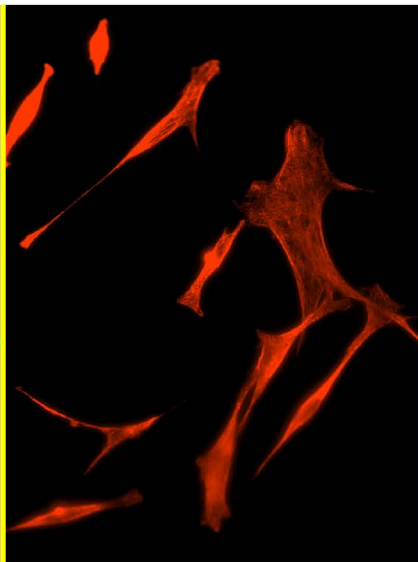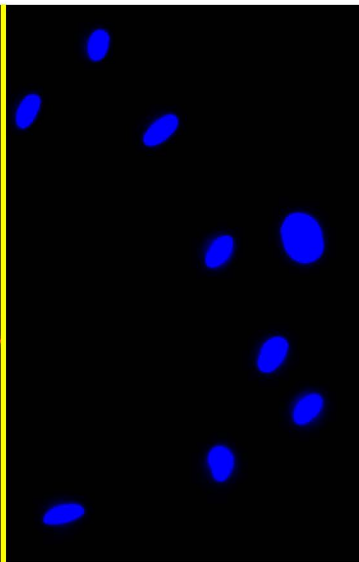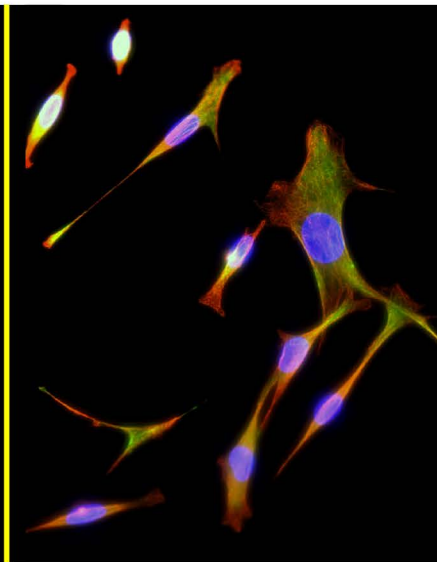

PPT1

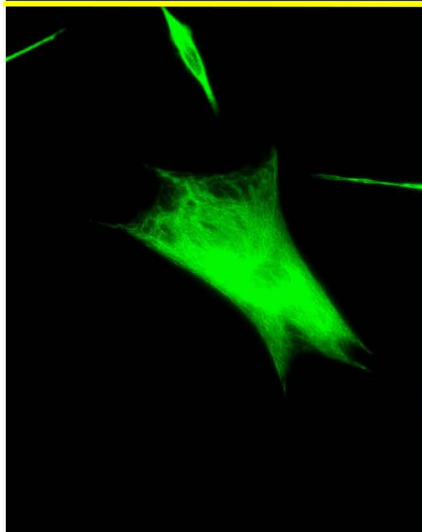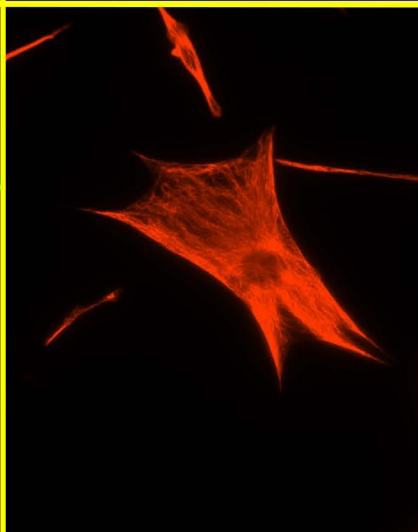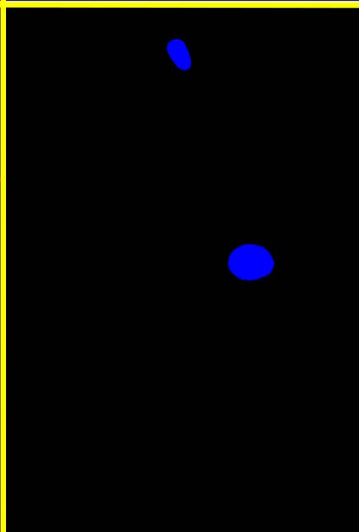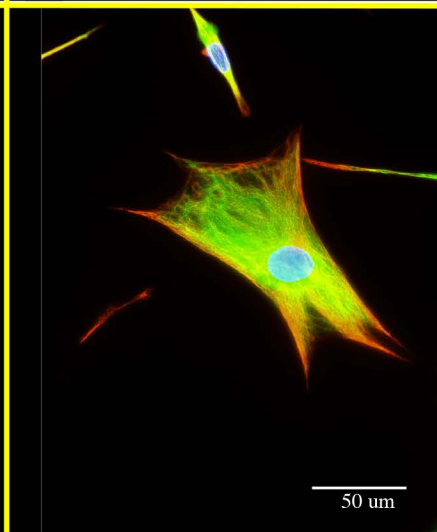

50 μm

Wild type

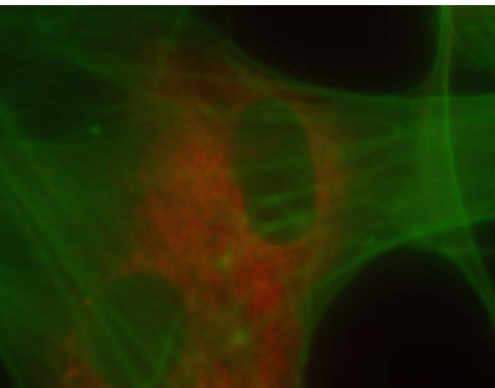

PPT1

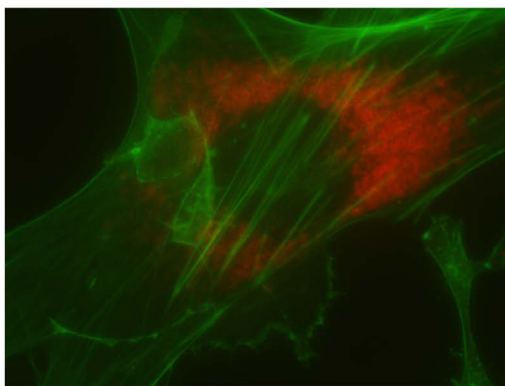

HFF

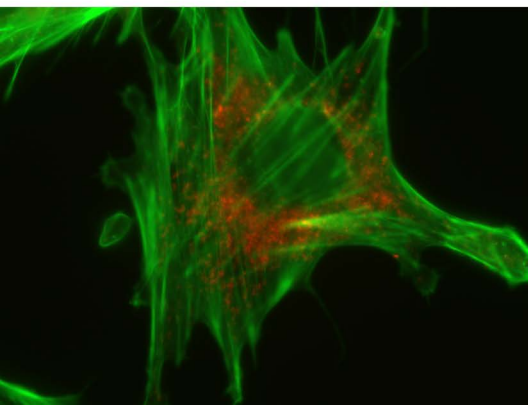

MRC

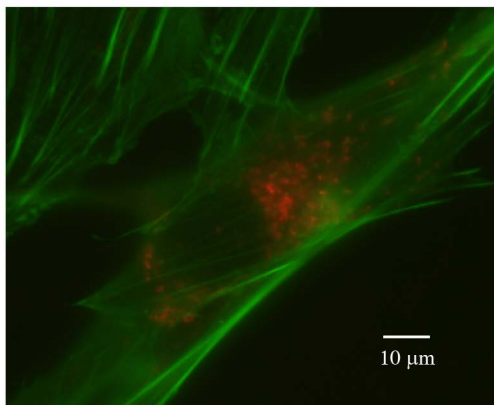

Source: http://biorxiv.org/content/10.1101/2020.09.14.295881v1.full.pdf
